# Supplementary material for: Creation of spin switching in graphene oxide-based hybrid film materials with an anionic Fe(iii) 5Cl-salicyaldehyde–thiosemicarbazone complex
Source: Royal Society of Chemistry journal article supplement (doi:10.1039/d4dt01593b), 2024-01-01
Supplement: d4dt01593b1.pdf [file d4dt01593b1.pdf]

## Electronic Supplementary Information (ESI)

### Creation of spin-switching in graphene oxide-based hybrid film materials with anionic Fe(III) 5Cl-salicylaldehyde-thiosemicarbazone complex

Nataliya G. Spitsyna\*<sup>a</sup>, Anatoly S. Lobach,<sup>a</sup> Maxim A. Blagov,<sup>a</sup> Nadezhda N. Dremova,<sup>a</sup> Alexei I. Dmitriev,<sup>a</sup> Mikhail V. Zhidkov,<sup>a</sup> Sergei V. Simonov<sup>b</sup>

---

<sup>a</sup>*Federal Research Center of Problems of Chemical Physics and Medicinal Chemistry, Russian Academy of Sciences, Chernogolovka, Moscow region 142432, Russia.*

*E-mail: spitsina@icp.ac.ru*

<sup>b</sup>*Institute of Solid State Physics RAS, Chernogolovka, MD 142432, Russia*

#### Author Contributions

N.G.S., A.S.L. conceived the idea and designed experiments, synthesized samples and wrote the paper. N.N.D performed SEM, EDX investigation. S.V.S performed PXRD analysis. K.V.Z., A.N.V performed *dc* magnetic measurements. M.A.B measured and contributed to analyses of <sup>57</sup>Fe Mössbauer spectral data, performed the DFT calculations. All authors discussed the results and contributed to the final manuscript.

## Contents

|                      |                                                                                                                                                                                                                                                                               |             |
|----------------------|-------------------------------------------------------------------------------------------------------------------------------------------------------------------------------------------------------------------------------------------------------------------------------|-------------|
| <b>Figure S1</b>     | UV-vis spectrum of salt $[\text{Et}_4\text{N}][^{57}\text{Fe}^{\text{III}}(5\text{Cl-thsa})_2]$ ( <b>1</b> ) in acetonitrile solution                                                                                                                                         | p. S2       |
| <b>Figure S2</b>     | PXRD patterns for initial ( <b>1</b> ) and recrystallized ( <b>1'</b> ) from acetonitrile $[\text{Et}_4\text{N}][^{57}\text{Fe}(5\text{Cl-thsa})_2]$ salt                                                                                                                     | p. S2       |
| <b>Figure S3</b>     | Photo of the film GO- <b>1</b> hybrid material                                                                                                                                                                                                                                | p. S2       |
| <b>Table S1</b>      | Table of experimental ATR FT-IR vibrational modes of compound $[\text{Et}_4\text{N}][^{57}\text{Fe}^{\text{III}}(5\text{Cl-thsa})_2]$ , films GO and hybrid GO- <b>1</b>                                                                                                      | p. S3       |
| <b>Figure S4</b>     | Selected experimental and calculated IR vibrational modes of the GO- <b>1</b> system in HS state                                                                                                                                                                              | p. S4       |
| <b>Figure S5</b>     | XPS spectra of salt <b>1</b> , GO and GO- <b>1</b> films                                                                                                                                                                                                                      | p. S5       |
| <b>Figure S6</b>     | EDX elemental analysis of GO- <b>1</b> hybrid film                                                                                                                                                                                                                            | p. S5       |
| <b>Figure S7</b>     | Cross-section SEM image of GO- <b>1</b> hybrid film, corresponding EDX spectrum, combined map of Fe, S, Cl and maps of elements                                                                                                                                               | p. S6       |
| <b>Figure S8</b>     | The first order differentiation of $\gamma_{\text{HS}}$ versus T plots in temperature range 80-300 K for <b>1</b> salt and GO- <b>1</b> hybrid film on cooling and heating mode                                                                                               | p. S7       |
| <b>Figure S9</b>     | Mössbauer spectra for the salt <b>1</b> in the temperature range 296-80 K in cooling mode                                                                                                                                                                                     | p. S8       |
| <b>Table S2</b>      | Mössbauer parameters for spectra of $[\text{Et}_4\text{N}][^{57}\text{Fe}(5\text{Cl-thsa})_2]$ salt in the temperature range 296-80 K in cooling mode                                                                                                                         | p. S9       |
| <b>Figure S10</b>    | Mössbauer spectra for the salt <b>1</b> recrystallized from acetonitrile in the temperature range 296-80 K in cooling mode                                                                                                                                                    | p. S10      |
| <b>Table S3</b>      | Mössbauer parameters for spectra of salt <b>1</b> recrystallized from acetonitrile in the temperature range 296-80 K in cooling mode                                                                                                                                          | p. S11      |
| <b>Figure S11</b>    | Mössbauer spectra for the GO- <b>1</b> hybrid film in the temperature range 296-80 K in cooling mode                                                                                                                                                                          | p. S11      |
| <b>Table S4</b>      | Mössbauer parameters for spectra of GO- <b>1</b> hybrid film in the temperature range temperature range 296-80 K in cooling mode                                                                                                                                              | p. S12      |
| <b>Figure S12</b>    | Optimized geometries of isolated GO (left) and $[\text{Et}_4\text{N}]^+$ -GO (right) system with (C/O=1.82)                                                                                                                                                                   | p. S12      |
| <b>Table S5</b>      | Electronic energy ( $E_{\text{el}}$ ), zero-point vibration energy ( $E_{\text{ZPV}}$ ) for $[\text{Et}_4\text{N}]^+$ , GO and $[\text{Et}_4\text{N}]^+$ on the GO surface (C/O=1.82). Interaction energy of $[\text{Et}_4\text{N}]^+$ with the GO surface is $E(\text{ads})$ | p. S12      |
| <b>Table S6</b>      | Electronic energy, zero-point vibration energy, total energy and relative energy $E_0(\text{wB97XD})$ of the optimized GO- <b>1</b> hybrid system                                                                                                                             | p. S13      |
| <b>Table S7</b>      | Electronic energy and relative electronic energy of the single point calculation by B3LYP* functional of the optimized GO- <b>1</b> hybrid system in wB97XD functional                                                                                                        | p. S13      |
| <b>Table S8</b>      | Electronic energy, zero-point vibration energy, total energy and total energy difference between the HS and LS states ( $\Delta E_0(\text{HS-LS})$ ) of the optimized <b>1</b> isolated molecule                                                                              | p. S13      |
| <b>Figure S13</b>    | Optimized structures of isolated $[\text{Et}_4\text{N}][\text{Fe}(5\text{Cl-thsa})_2]$ complex in HS and LS state                                                                                                                                                             | p. S13      |
| <b>Figure S14</b>    | The overlay of GO from optimized structures of GO- <b>1</b> hybrid system in HS and LS state                                                                                                                                                                                  | p. S14      |
| <b>Table S9</b>      | Table of parameters of Fe(III)-ligand bond lengths and the angle $\alpha$ value between the phenoxy planes of the $(5\text{Cl-thsa})^{2-}$ ligand for optimized HS and LS states of the GO- <b>1</b> hybrid system and <b>1</b> isolated complex                              | p. S14      |
| <b>Table S10–S25</b> | Cartesian coordinates of optimized structures                                                                                                                                                                                                                                 | pp. S15–S46 |

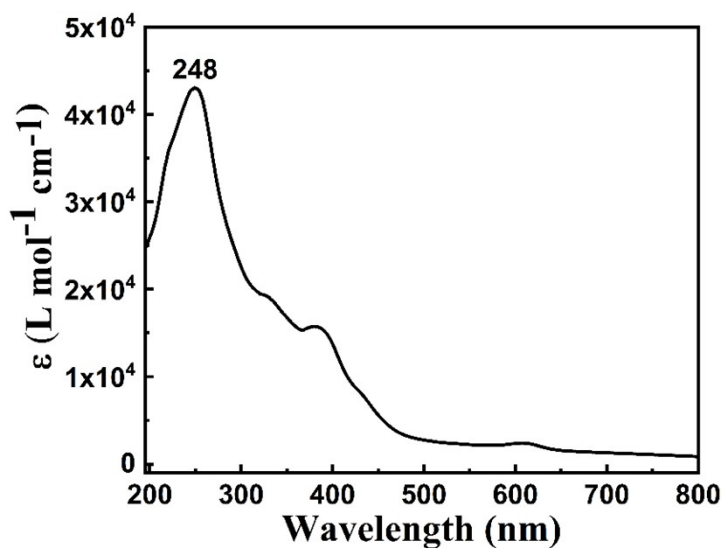

**Figure S1.** UV-vis spectrum of salt  $[\text{Et}_4\text{N}][^{57}\text{Fe}^{\text{III}}(5\text{Cl-thsa})_2]$  (**1**) in acetonitrile solution.

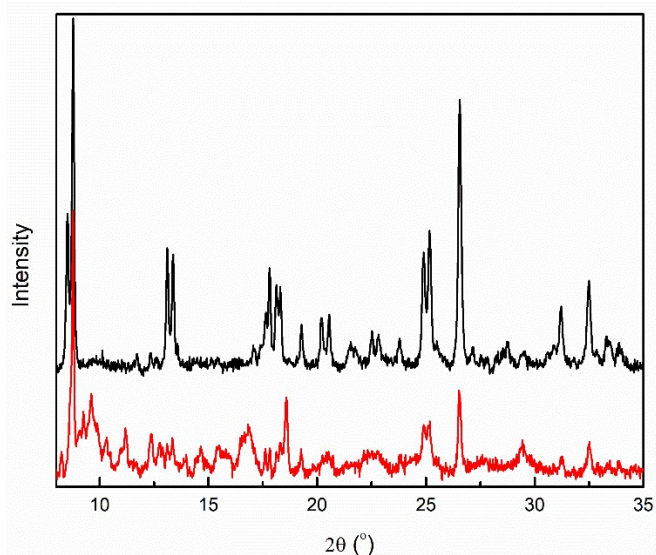

**Figure S2.** Normalized powder X-ray diffraction patterns in the  $8^\circ$  to  $35^\circ$  region for initial (**1**, black line) and recrystallized (**1'**, red line) from acetonitrile  $[\text{Et}_4\text{N}][^{57}\text{Fe}(5\text{Cl-thsa})_2]$  salt.

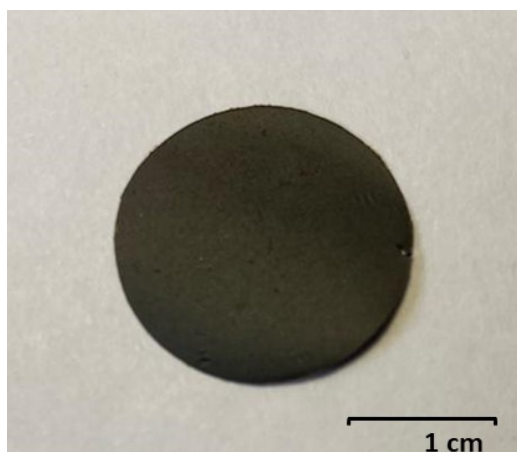

**Figure S3.** Photo of the film GO-1 hybrid material: the thickness  $\sim 45 \mu\text{m}$  and 2 cm in diameter.

**Table S1.** Table of experimental ATR FT-IR vibrational modes of compound [Et<sub>4</sub>N][<sup>57</sup>Fe<sup>III</sup>(5Cl-thsa)<sub>2</sub>], films GO and hybrid GO-1.

| [Et <sub>4</sub> N][ <sup>57</sup> Fe <sup>III</sup> (5Cl-thsa) <sub>2</sub> ]<br>(1), $\nu$ , cm <sup>-1</sup> | Film<br>GO,<br>$\nu$ , cm <sup>-1</sup> | Film GO-<br>1,<br>$\nu$ , cm <sup>-1</sup> | Assignment of the most significant<br>of vibration modes                                                                                                                        |
|-----------------------------------------------------------------------------------------------------------------|-----------------------------------------|--------------------------------------------|---------------------------------------------------------------------------------------------------------------------------------------------------------------------------------|
| 3533(w)                                                                                                         |                                         | 3533(sh)*                                  | $\nu$ (N-H)                                                                                                                                                                     |
| 3458(s)                                                                                                         |                                         | 3457(w)*                                   | $\nu$ (N-H)                                                                                                                                                                     |
| 3406(s)                                                                                                         |                                         | 3408(w)*                                   | $\nu$ (N-H)                                                                                                                                                                     |
|                                                                                                                 | ~3292(s)                                | ~3330 (s)                                  | $\nu$ (C-OH)                                                                                                                                                                    |
| 3270(s)                                                                                                         |                                         | ~3270(w)*                                  | $\nu$ (N-H), $\nu$ (C <sub>arom</sub> -H)                                                                                                                                       |
| 2979(m)                                                                                                         |                                         | ~2979(sh)*                                 | $\nu_{\text{asym}}$ -CH <sub>3</sub> (Et <sub>4</sub> N <sup>+</sup> )                                                                                                          |
|                                                                                                                 | 2962(sh)                                | 2962(sh)*                                  | $\nu$ (C-H) -CH <sub>2</sub>                                                                                                                                                    |
|                                                                                                                 | 2929(sh)                                | 2929(sh)*                                  | $\nu$ (C-H) -CH                                                                                                                                                                 |
|                                                                                                                 | 1724(s)                                 | 1732(m)                                    | $\nu$ (C=O)                                                                                                                                                                     |
| 1635(m)                                                                                                         |                                         | 1635(w)*                                   | $\nu$ (C <sub>arom</sub> -C <sub>arom</sub> )                                                                                                                                   |
| 1604(w)                                                                                                         | 1614(s)                                 | 1607(s)                                    | $\delta$ (-OH),                                                                                                                                                                 |
|                                                                                                                 | 1577(s)                                 | 1571(sh)                                   | $\nu$ (>C=C<)                                                                                                                                                                   |
| 1588(m)                                                                                                         |                                         | 1591(sh)                                   | $\nu$ (C=N <sub>im</sub> ) (azomethine group)                                                                                                                                   |
| 1437(w)                                                                                                         |                                         | 1419w                                      | $\nu$ (C <sub>arom</sub> -O)                                                                                                                                                    |
| 1359(m)                                                                                                         | 1363(s)                                 | 1352w                                      | $\delta$ (OH) in C-OH                                                                                                                                                           |
| 1313 (sh)                                                                                                       |                                         | 1318w                                      | C-H, C-OH; GO                                                                                                                                                                   |
| 1295(s)                                                                                                         |                                         | 1294m*                                     | $\nu$ (N-H)                                                                                                                                                                     |
|                                                                                                                 | 1225(w)                                 | 1225(w)                                    | $\nu$ (C-O-C)epoxy                                                                                                                                                              |
| 1184(s)                                                                                                         |                                         | 1188(m)                                    | $\delta$ (N-H)                                                                                                                                                                  |
| 1122(sh)                                                                                                        |                                         | 1128(sh)                                   | $\nu$ (C <sub>arom</sub> -Cl)                                                                                                                                                   |
| 1093(m)                                                                                                         |                                         | 1084(sh)                                   | $\nu$ (C <sub>arom</sub> -Cl)                                                                                                                                                   |
|                                                                                                                 | 1045(s)                                 | ~1050(s)                                   | $\nu$ (C-O)alkoxy                                                                                                                                                               |
| 1031(m)                                                                                                         |                                         | 1036(sh)                                   | $\nu_{\text{sym}}$ (C-N), $\nu_{\text{asym}}$ (C-N) (Et <sub>4</sub> N <sup>+</sup> )                                                                                           |
| 970(w)                                                                                                          |                                         | 977(sh)                                    | $\delta$ (C <sub>arom</sub> -H), $\delta$ (C-H)                                                                                                                                 |
| 930(m)                                                                                                          |                                         | 934(sh)                                    | $\delta$ (C <sub>arom</sub> -H), $\delta$ (C-H)                                                                                                                                 |
| 818(s)                                                                                                          |                                         | 821(m)                                     | $\delta$ (N-H), $\nu$ (C-S)                                                                                                                                                     |
| 661(s)                                                                                                          |                                         | 660(w)*                                    | $\nu_{\text{sym}}$ (C-N) (Et <sub>4</sub> N <sup>+</sup> ), $\delta$ (C <sub>arom</sub> -H),<br>$\nu$ (C <sub>arom</sub> -C <sub>arom</sub> ), $\delta$ (N-H), $\delta$ (Fe-O), |
| 535(m)                                                                                                          |                                         | 533(w)*                                    | $\nu$ (Fe-S), $\nu$ (Fe-N)                                                                                                                                                      |
| 456(m)                                                                                                          |                                         | 456(w)*                                    | $\nu$ (Fe-O)                                                                                                                                                                    |

(w): weak, (m): middle, (s): strong, (sh): shoulder, \*- bands are coincided.

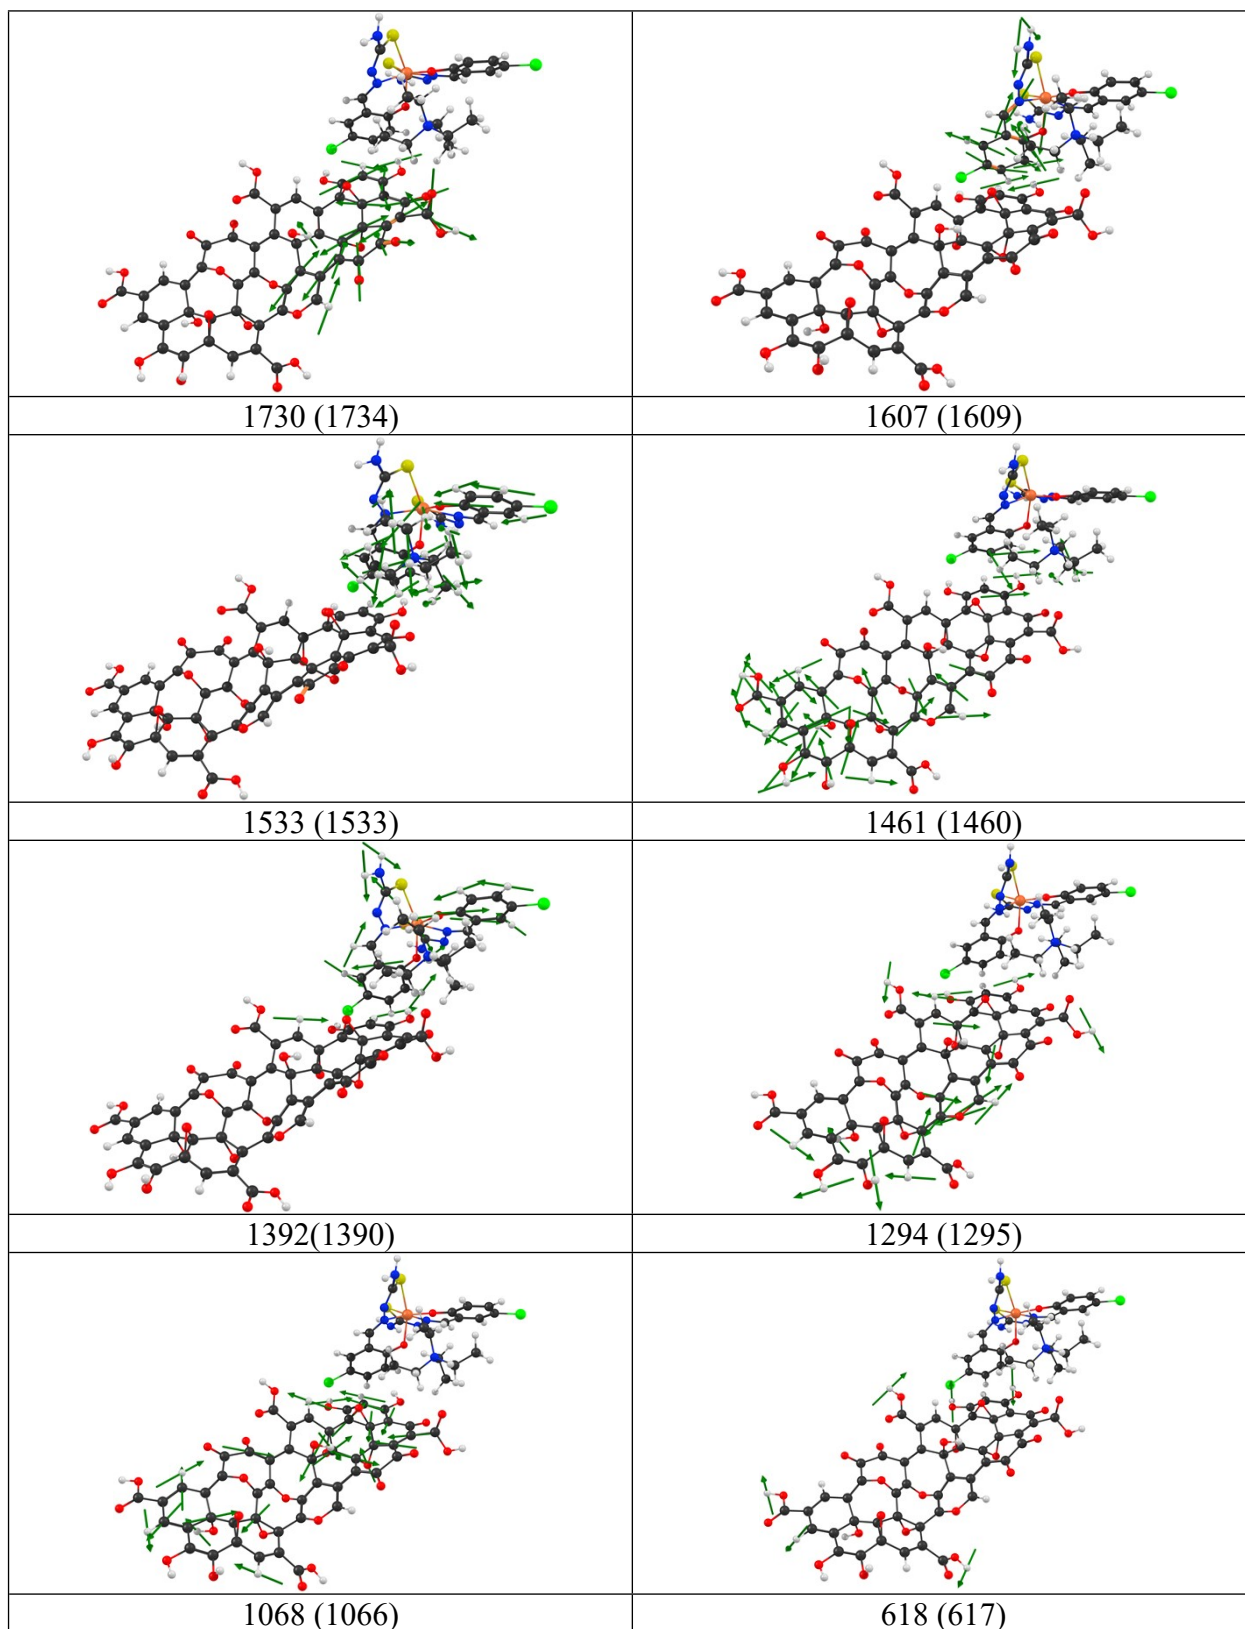

**Figure S4.** Selected experimental and calculated (in brackets) IR vibrational modes of the GO-1 system in HS state (wB97XD/6-31G(d,p)).

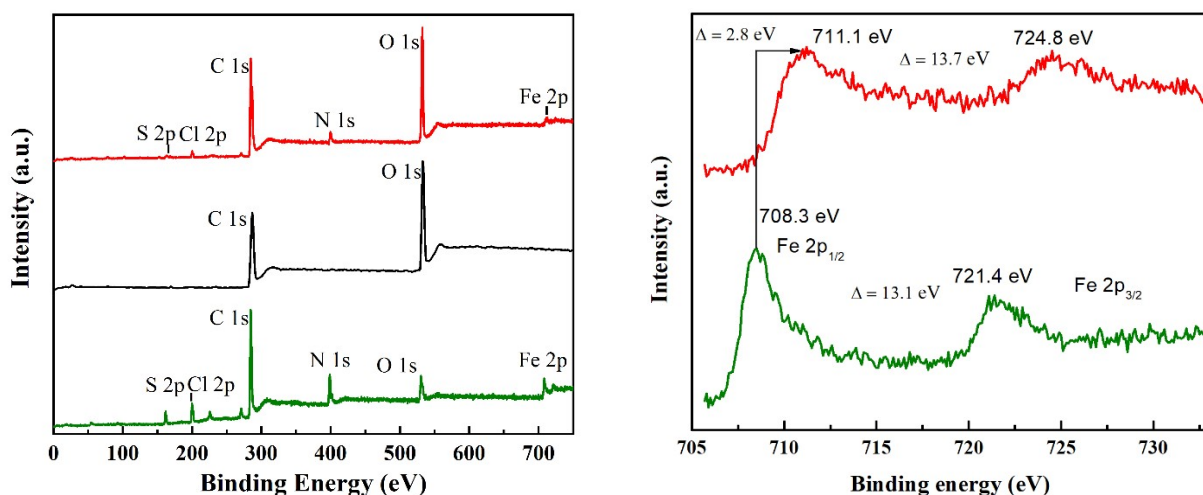

**Figure S5.** *Left:* XPS full spectra of salt **1** (green line), GO (black line) and GO-**1** (red line) films. *Right:* High-resolution XPS spectra of Fe 2p for bulk salt **1** (708.2 eV, green line) and GO-**1** film (712.7 eV, red line).

Figure S5/right demonstrates the existence of Fe 2p<sub>3/2</sub> (for salt **1** – 721.4 eV; GO-**1** – 724.8 eV) and Fe 2p<sub>1/2</sub> (for salt **1** – 708.3 eV; GO-**1** – 711.1 eV) peaks. This shift and broadening of these peaks in spectra of GO-**1** compared to salt **1** are due to electronic interactions between the spin-crossover complexes and GO nanosheets.

*Method:* XPS analyses were carried out using monochromated Al (K $\alpha$  = 1486.6 eV) X-ray source of Kratos Ultra DLD spectrometer. The analysis area was 300 x 700  $\mu\text{m}^2$ . A scan was performed at a pass energies were 80 and 40 eV for the survey and high-resolution spectra, respectively. The spectra were calibrated to the C 1s signal (284.7 eV).

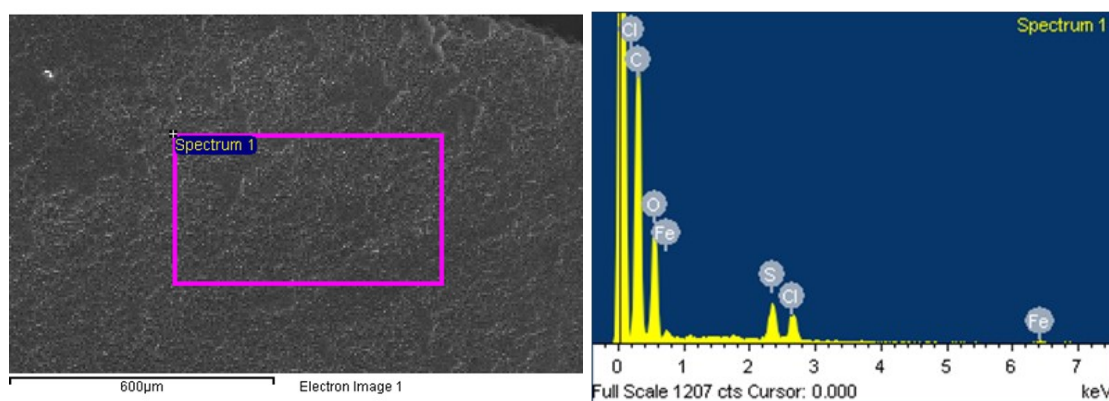

**Figure S6.** EDX elemental analysis of GO-**1** hybrid film.

Fe:S:Cl=1:2:2.

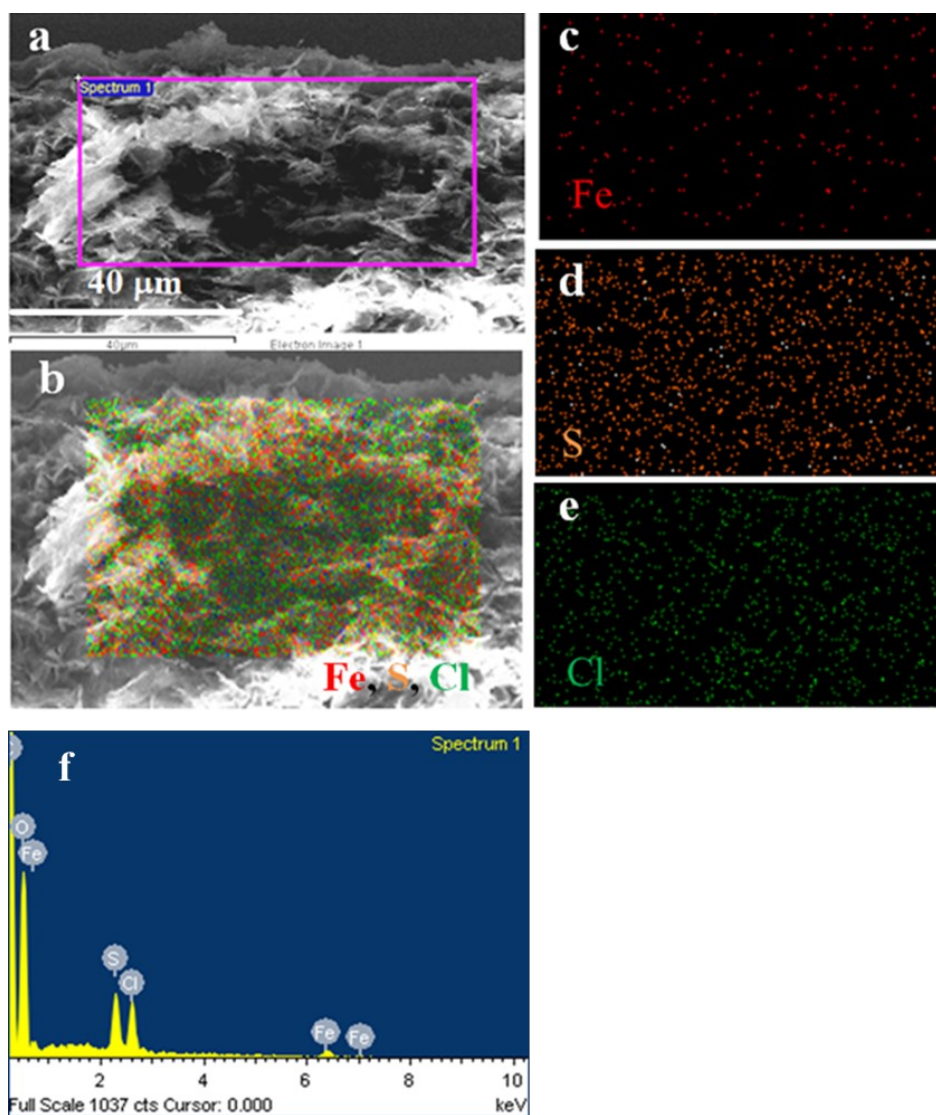

**Figure S7.** Cross-section SEM image of (a) GO-1 hybrid film, (b) corresponding EDX combined map of Fe, S, Cl and maps of (c) Fe, (d) S and (e) Cl elements, (f) EDX spectrum.

The distribution of Fe, S and Cl elements in the (b) image proves the uniform distribution of **1** in the volume of the GO-1 film. Fe:S:Cl=1:2:2.



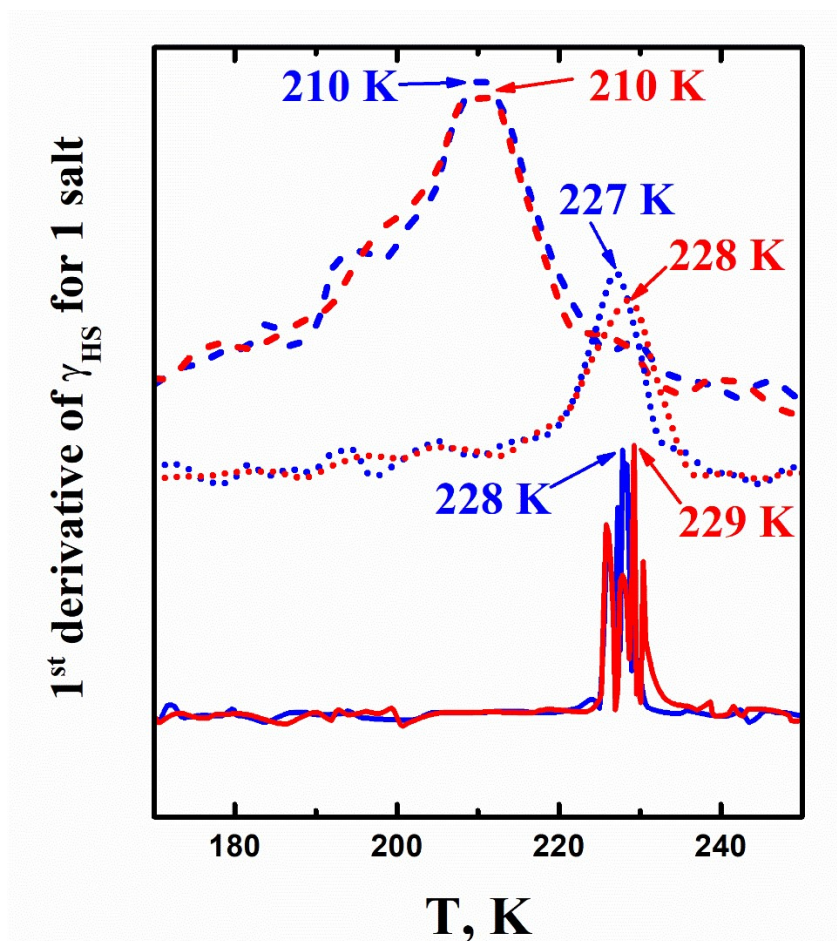

**Figure S8.** The first order differentiation of  $\gamma_{\text{HS}}$  versus  $T$  in temperature range 80–300 K plots for  $[\text{Et}_4\text{N}][^{57}\text{Fe}(\text{5Cl-thsa})_2]$  salt (dash line; dots line- from  $\text{CH}_3\text{CN}$ ) and GO-1 hybrid film (solid line) on cooling (blue) and heating (red) mode.



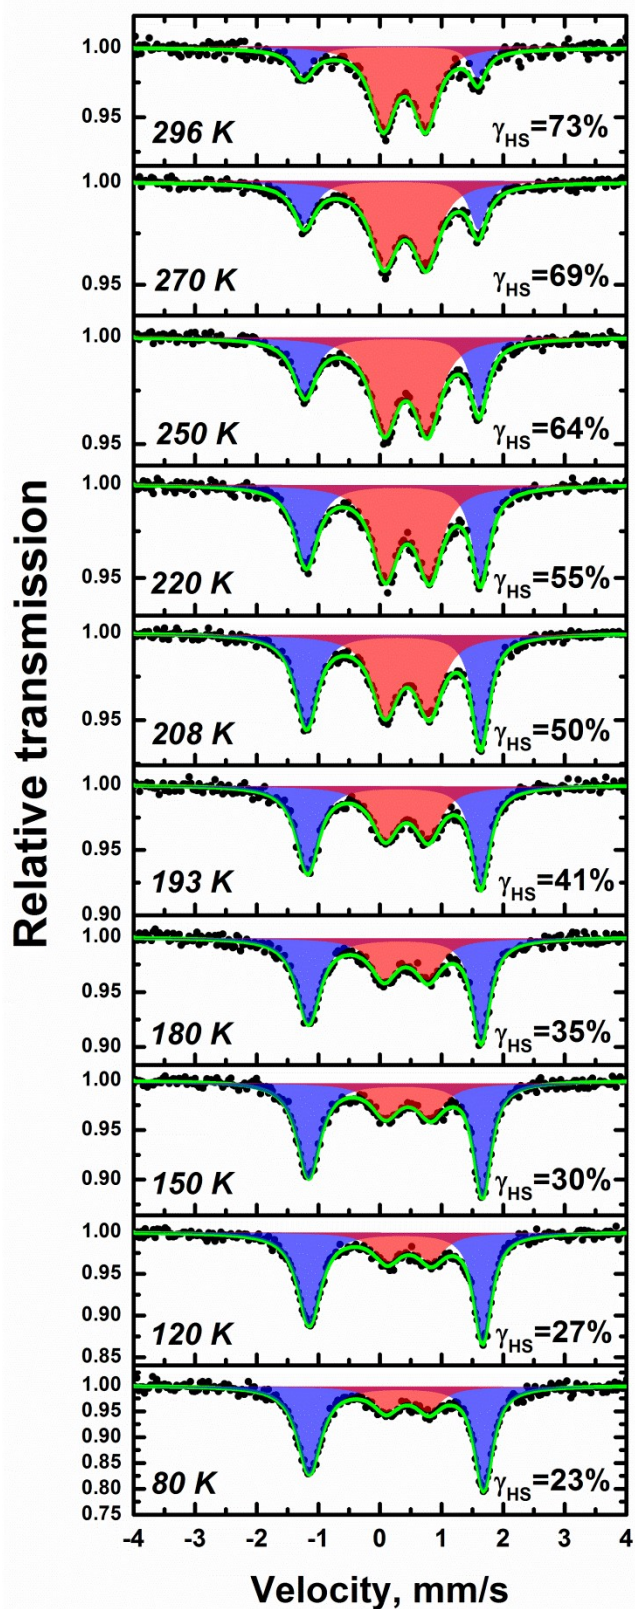

**Figure S9.** Mössbauer spectra for the salt 1 in the temperature range 296-80 K in cooling mode. Fit line colored in green. A doublet highlighted in red corresponds to Fe(III) ions in the HS state ( $S=5/2$ ), whereas the doublet highlighted in blue corresponds to Fe(III) ions in the LS state ( $S=1/2$ ).

**Table S2.** Mössbauer parameters for spectra of  $[\text{Et}_4\text{N}][^{57}\text{Fe}(\text{5Cl-thsa})_2]$  salt in the temperature range 296-80 K in cooling mode.

| T., K | $\Delta E_Q$ , mm/s |          | $\delta$ , mm/s |          | $\Gamma$ , mm/s |          |          | $\gamma_{\text{HS}}$ , % |
|-------|---------------------|----------|-----------------|----------|-----------------|----------|----------|--------------------------|
|       | HS                  | LS       | HS              | LS       | HS              | LS       |          |                          |
|       |                     |          |                 |          |                 | —        | +        |                          |
| 296   | 0.689(6)            | 2.83(1)  | 0.397(4)        | 0.176(7) | 0.464(9)        | 0.42(4)  | 0.31(2)  | 73                       |
| 270   | 0.686(4)            | 2.823(6) | 0.409(2)        | 0.187(3) | 0.518(6)        | 0.42(1)  | 0.34(1)  | 69                       |
| 250   | 0.702(5)            | 2.83(1)  | 0.423(4)        | 0.197(7) | 0.515(7)        | 0.44(4)  | 0.35(2)  | 64                       |
| 220   | 0.720(4)            | 2.830(4) | 0.446(3)        | 0.218(2) | 0.500(7)        | 0.44(1)  | 0.353(8) | 55                       |
| 208   | 0.715(4)            | 2.828(3) | 0.443(3)        | 0.223(1) | 0.517(7)        | 0.429(7) | 0.333(5) | 50                       |
| 193   | 0.697(8)            | 2.809(9) | 0.435(5)        | 0.232(2) | 0.52(1)         | 0.433(9) | 0.344(7) | 41                       |
| 180   | 0.72(1)             | 2.800(4) | 0.427(6)        | 0.241(2) | 0.53(2)         | 0.453(9) | 0.34(1)  | 35                       |
| 150   | 0.73(1)             | 2.820(3) | 0.458(7)        | 0.254(2) | 0.54(2)         | 0.447(8) | 0.336(6) | 30                       |
| 120   | 0.71(1)             | 2.815(3) | 0.476(7)        | 0.261(1) | 0.53(2)         | 0.443(7) | 0.340(5) | 27                       |
| 80    | 0.69(1)             | 2.830(3) | 0.448(7)        | 0.269(1) | 0.50(2)         | 0.457(7) | 0.351(5) | 23                       |

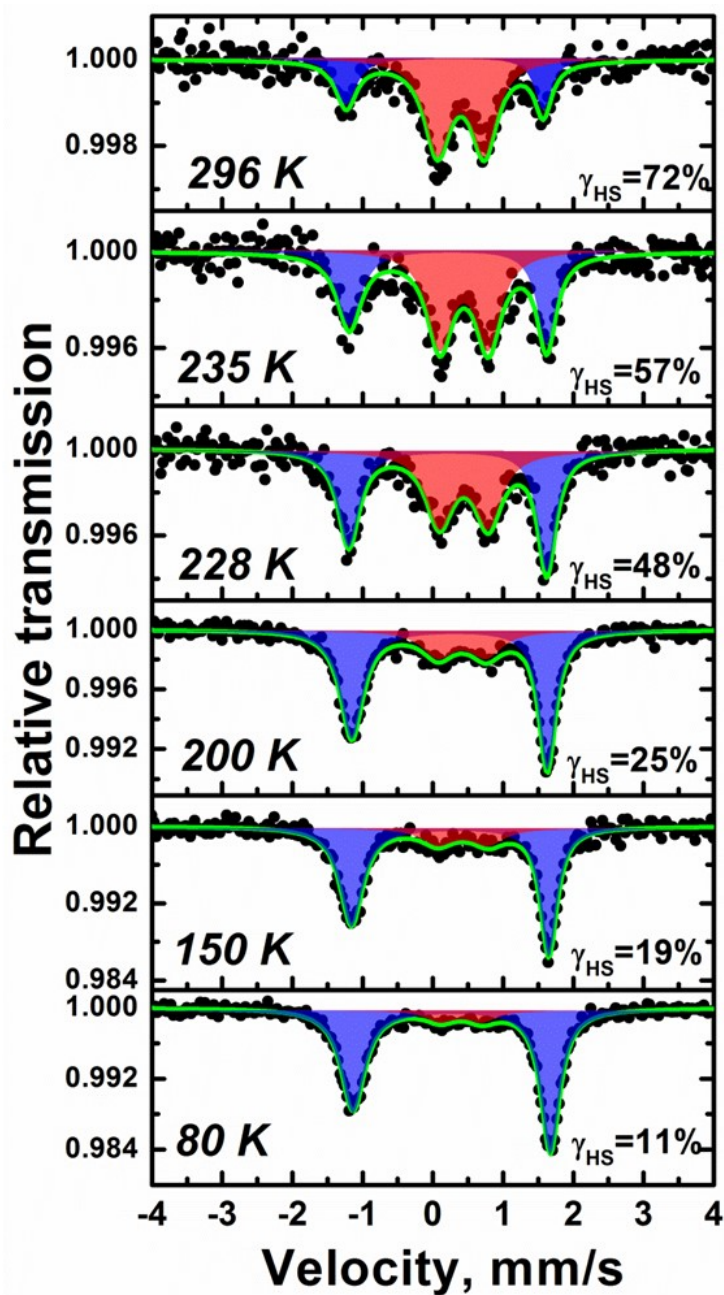

**Figure S10.** Mössbauer spectra for the salt **1'** recrystallized from acetonitrile at the temperature range 296–80 K in cooling mode. Fit line colored in green. A doublet highlighted in red corresponds to Fe(III) ions in the HS state ( $S=5/2$ ), whereas the doublet highlighted in blue corresponds to Fe(III) ions in the LS state ( $S=1/2$ ).

**Table S3.** Mössbauer parameters for spectra of salt **1** from acetonitrile solution at the temperature range 296–80 K in cooling mode.

| T, K | $\Delta E_Q$ , mm/s |          | $\delta$ , mm/s |          | HS      | $\Gamma$ , mm/s |          | $\gamma_{HS}$ , % |
|------|---------------------|----------|-----------------|----------|---------|-----------------|----------|-------------------|
|      | HS                  | LS       | HS              | LS       |         | LS              |          |                   |
|      |                     |          |                 |          |         | -               | +        |                   |
| 296  | 0.67(1)             | 2.81(1)  | 0.399(7)        | 0.169(9) | 0.45(2) | 0.36(4)         | 0.29(4)  | 72                |
| 235  | 0.69(1)             | 2.81(1)  | 0.445(7)        | 0.216(7) | 0.44(2) | 0.42(3)         | 0.33(2)  | 57                |
| 228  | 0.70(1)             | 2.821(9) | 0.442(9)        | 0.213(5) | 0.47(2) | 0.37(2)         | 0.31(2)  | 48                |
| 200  | 0.68(2)             | 2.786(3) | 0.42(1)         | 0.238(2) | 0.56(3) | 0.400(8)        | 0.297(6) | 25                |
| 150  | 0.72(4)             | 2.810(4) | 0.43(2)         | 0.247(2) | 0.57(6) | 0.40(1)         | 0.292(8) | 19                |
| 80   | 0.60(3)             | 2.810(3) | 0.41(2)         | 0.268(1) | 0.52(6) | 0.419(7)        | 0.334(4) | 11                |

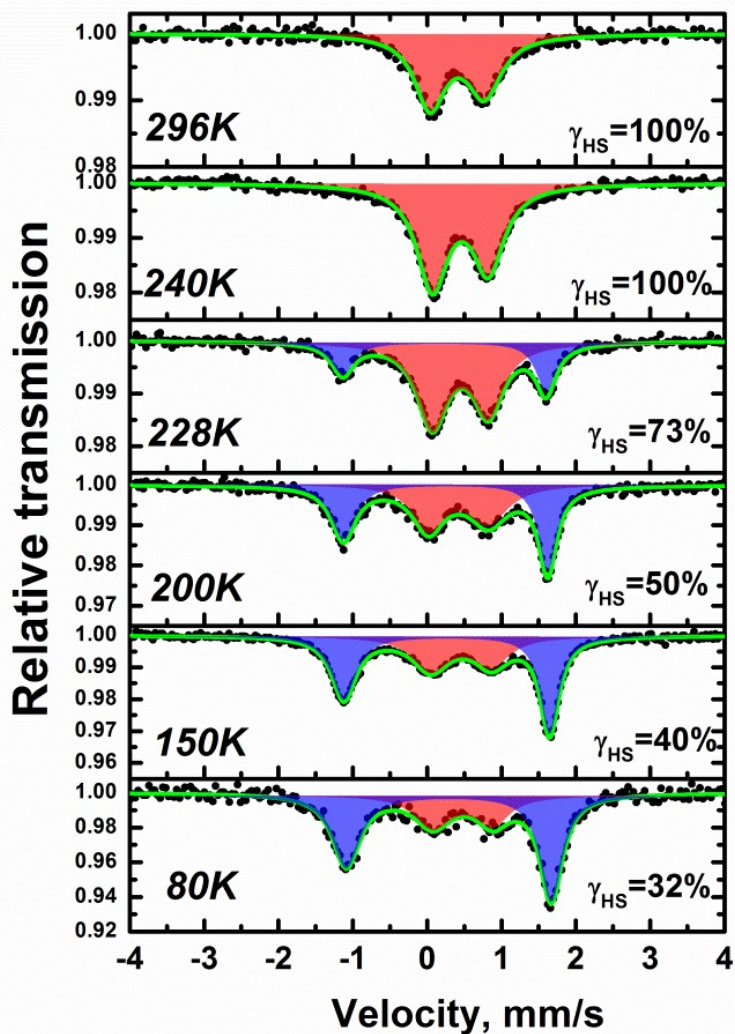

**Figure S11.** Mössbauer spectra for the GO-1 hybrid film in the temperature range 296-80 K in cooling mode. Fit line colored in green. A doublet highlighted in red corresponds to Fe(III) ions

in the HS state ( $S=5/2$ ), whereas the doublet highlighted in blue corresponds to Fe(III) ions in the LS state ( $S=1/2$ ).

**Table S4.** Mössbauer parameters for spectra of GO-1 hybrid film in the temperature range temperature range 296-80 K in cooling mode.

| T., K | $\Delta E_Q$ , mm/s |          | $\delta$ , mm/s |          | $\Gamma$ , mm/s    |                    | $\gamma_{HS}$ , % |
|-------|---------------------|----------|-----------------|----------|--------------------|--------------------|-------------------|
|       | HS                  | LS       | HS              | LS       | HS                 | LS                 |                   |
| 296   | 0.732(6)            | —        | 0.404(4)        | —        | 0.50(2)<br>0.55(2) | —                  | 100               |
| 240   | 0.752(3)            | —        | 0.446(2)        | —        | 0.51(1)            | —                  | 100               |
| 228   | 0.751(4)            | 2.735(7) | 0.446(2)        | 0.232(4) | 0.50(1)<br>0.49(1) | 0.37(2)<br>0.33(1) | 73                |
| 200   | 0.81(1)             | 2.747(4) | 0.422(6)        | 0.248(2) | 0.51(2)<br>0.63(3) | 0.39(1)<br>0.30(1) | 50                |
| 150   | 0.82(1)             | 2.768(2) | 0.459(5)        | 0.264(1) | 0.59(2)<br>0.57(2) | 0.40(1)<br>0.30(1) | 40                |
| 80    | 0.81(2)             | 2.757(6) | 0.480(9)        | 0.291(3) | 0.59(5)<br>0.54(6) | 0.45(2)<br>0.37(1) | 32                |

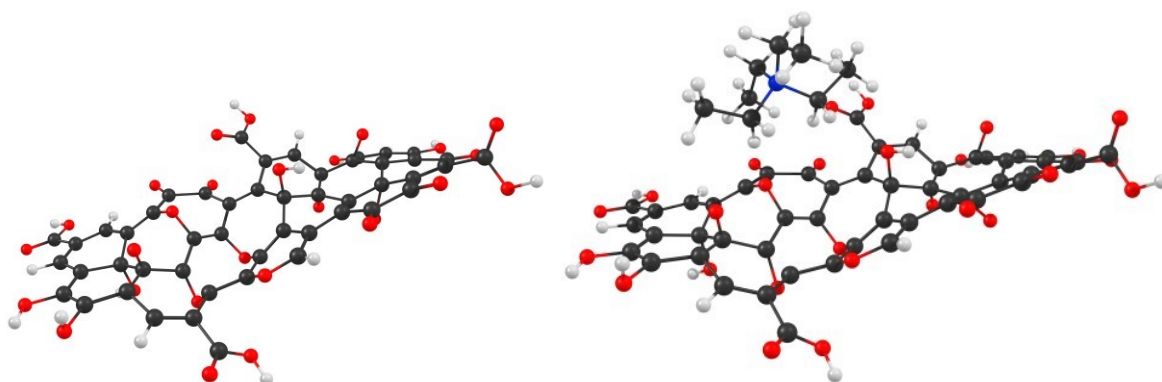

**Figure S12.** Optimized geometries of isolated GO (left) and  $[\text{Et}_4\text{N}]^+$ -GO (right) system with ( $C/O=1.82$ ). Calculations were performed at the M062X/6-31G(d,p) theory level.

**Table S5.** Electronic energy ( $E_{el}$ ), zero-point vibration energy ( $E_{ZPV}$ ) for  $[\text{Et}_4\text{N}]^+$ , GO and  $[\text{Et}_4\text{N}]^+$  on the GO surface ( $C/O=1.82$ ). Interaction energy of  $[\text{Et}_4\text{N}]^+$  with the GO surface is  $E(\text{ads})$ . Calculations were performed with 6-31G(d,p) basis set.

| Functional | $[\text{Et}_4\text{N}]^+\cdots\text{GO}$ system |                  | GO              |                  | $[\text{Et}_4\text{N}]^+$ cation |                  | $E(\text{ads})$ , kJ/mol |
|------------|-------------------------------------------------|------------------|-----------------|------------------|----------------------------------|------------------|--------------------------|
|            | $E_{el}$ , a.u.                                 | $E_{ZPV}$ , a.u. | $E_{el}$ , a.u. | $E_{ZPV}$ , a.u. | $E_{el}$ , a.u.                  | $E_{ZPV}$ , a.u. |                          |
| M06-2X     | -4277.378423                                    | 0.881768         | -3906.088594    | 0.598170         | -371.251737                      | 0.280674         | <b>-92</b>               |
| wB97XD     | -4277.645072                                    | 0.881276         | -3906.245394    | 0.597557         | -371.3556706                     | 0.281173         | <b>-109</b>              |
| B97D       | -4276.150537                                    | 0.841155         | -3904.896192    | 0.565876         | -371.2083175                     | 0.273976         | <b>-117</b>              |



**Table S6.** Electronic energy ( $E_{el}$ ), zero-point vibration energy ( $E_{ZPV}$ ), total energy ( $E_0$ ) and relative energy  $E_0(wB97XD)$  of the optimized (wB97XD/6-31G(d,p)) GO-1 hybrid system.

| State | $E_{el}$ , a.u. | $E_{ZPV}$ , a.u. | $E_0(wB97XD)$ , kJ/mol |
|-------|-----------------|------------------|------------------------|
| HS1   | -8353.809758    | 1.161034         | -17.7                  |
| LS1   | -8353.804501    | 1.162514         | 0                      |
| LS2   | -8353.801163    | 1.164184         | 13.2                   |

**Table S7.** Electronic energy ( $E_{el}$ ) and relative electronic energy  $E_0(B3LYP^*)$  of the single point calculation by B3LYP\* functional of the optimized GO-1 hybrid system in wB97XD functional.

| State | $E_{el}$ , a.u. | $E_{el}(B3LYP^*)$ , kJ/mol |
|-------|-----------------|----------------------------|
| HS    | -8351.72        | 14.7                       |
| LS1   | -8351.73        | 0                          |
| LS2   | -8351.71        | 41.28                      |

**Table S8.** Electronic energy ( $E_{el}$ ), zero-point vibration energy ( $E_{ZPV}$ ), total energy ( $E_0$ ) and total energy difference between the HS and LS states ( $\Delta E_0(HS-LS)$ ) of the optimized **1** isolated molecule.

| Функционал | $E_{el}$ , a.u. |               | $E_{ZPV}$ , a.u. |          | $\Delta E_0(HS-LS)$ , kJ/mol |
|------------|-----------------|---------------|------------------|----------|------------------------------|
|            | HS              | LS            | HS               | LS       |                              |
| B3LYP*     | -4446.5197925   | -4446.5249792 | 0.547761         | 0.550093 | <b>16</b>                    |
| wB97XD     | -4447.515352    | -4447.5133741 | 0.560890         | 0.562801 | <b>-3</b>                    |

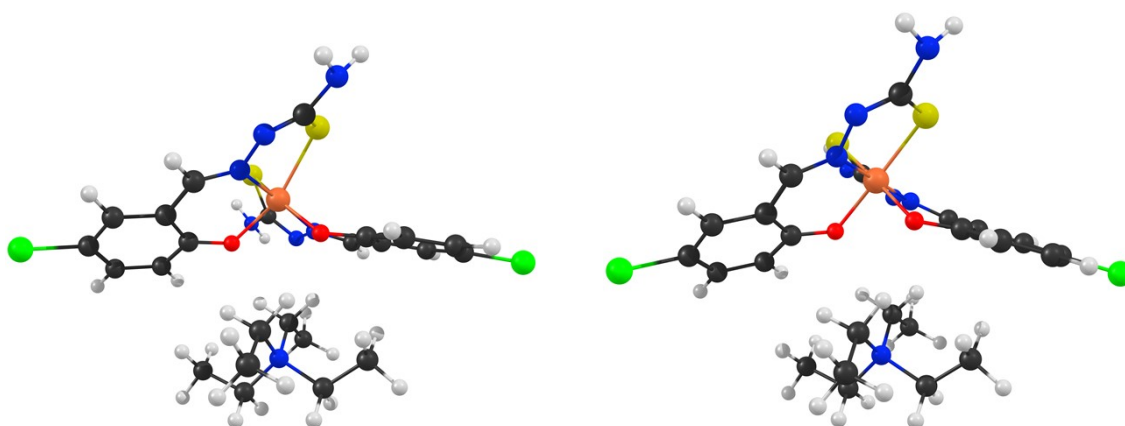

**Figure S13.** Optimized structures of isolated  $[Et_4N][Fe(5Cl-thsa)_2]$  complex in HS (left) and LS (right) state. Calculations were performed at the wB97XD /6-31G(d,p) theory level.



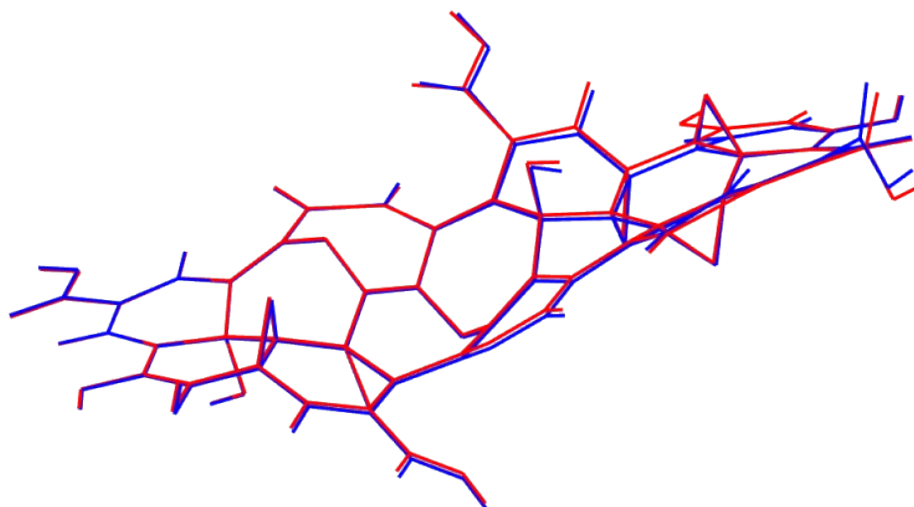

**Figure S14.** The overlay of GO from optimized structures of GO-1 hybrid system in HS (red) and LS (blue) state. Calculations were performed at the wB97XD /6-31G(d,p) theory level.

**Table S9.** Table of parameters of Fe(III)-ligand bond lengths and the angle  $\alpha$  value between the phenoxy planes of the 5Cl-thsa<sup>2-</sup> ligand for optimized HS and LS states of the GO-1 hybrid system and **1** isolated complex.

| Optimized structure | Spin state | Functional | Structural parameter |         |         |              |
|---------------------|------------|------------|----------------------|---------|---------|--------------|
|                     |            |            | Fe-S, Å              | Fe-N, Å | Fe-O, Å | $\alpha$ , ° |
| <b>1</b>            | HS         | B3LYP*     | 2.45291              | 2.18936 | 1.97259 | 112.7        |
|                     |            |            | 2.48532              | 2.23419 | 1.98258 |              |
|                     | LS         |            | 2.28226              | 1.94822 | 1.93688 | 126.5        |
|                     |            |            | 2.29059              | 1.95184 | 1.94254 |              |
| GO-1                | HS1        | wB97XD     | 2.41658              | 2.16470 | 1.93835 | 142.3        |
|                     |            |            | 2.46727              | 2.16528 | 1.96562 |              |
|                     | LS         |            | 2.26437              | 1.95431 | 1.91865 | 131.2        |
|                     |            |            | 2.27919              | 1.95557 | 1.92768 |              |
| GO-1                | LS1        | wB97XD     | 2.39133              | 2.16898 | 1.89934 | 151.0        |
|                     |            |            | 2.51982              | 2.19331 | 2.00681 |              |
|                     | LS2        |            | 2.26494              | 1.94904 | 1.91211 | 129.1        |
| 2.28483             |            | 1.95330    | 1.93925              |         |         |              |
|                     |            |            | 2.27035              | 1.95003 | 1.90987 | 129.8        |
|                     |            |            | 2.27231              | 1.95004 | 1.94792 |              |

**Table S10.** Optimized coordinates (B97D/6-31G(d,p)) of [Et<sub>4</sub>N]<sup>+</sup> cation in the singlet state. Units are in Å.

|   |                 |                 |                 |
|---|-----------------|-----------------|-----------------|
| C | 0.000017000000  | 1.232408000000  | 0.918271000000  |
| H | 0.885101000000  | 1.124829000000  | 1.554600000000  |
| H | -0.885042000000 | 1.124823000000  | 1.554631000000  |
| N | 0.000000000000  | 0.000000000000  | 0.000000000000  |
| C | 0.000000000000  | 2.579751000000  | 0.202161000000  |
| H | 0.000078000000  | 3.359859000000  | 0.975390000000  |
| H | -0.895354000000 | 2.728085000000  | -0.414646000000 |
| H | 0.895269000000  | 2.728041000000  | -0.414781000000 |
| C | 1.232408000000  | -0.000017000000 | -0.918271000000 |
| H | 1.124829000000  | -0.885101000000 | -1.554600000000 |
| H | 1.124823000000  | 0.885042000000  | -1.554631000000 |
| C | -2.579751000000 | 0.000000000000  | -0.202161000000 |
| H | -2.728041000000 | 0.895269000000  | 0.414781000000  |
| H | -2.728085000000 | -0.895354000000 | 0.414646000000  |
| H | -3.359859000000 | 0.000078000000  | -0.975390000000 |
| C | -0.000017000000 | -1.232408000000 | 0.918271000000  |
| H | 0.885042000000  | -1.124823000000 | 1.554631000000  |
| H | -0.885101000000 | -1.124829000000 | 1.554600000000  |
| C | -1.232408000000 | 0.000017000000  | -0.918271000000 |
| H | -1.124829000000 | 0.885101000000  | -1.554600000000 |
| H | -1.124823000000 | -0.885042000000 | -1.554631000000 |
| C | 2.579751000000  | 0.000000000000  | -0.202161000000 |
| H | 2.728085000000  | 0.895354000000  | 0.414646000000  |
| H | 3.359859000000  | -0.000078000000 | -0.975390000000 |
| H | 2.728041000000  | -0.895269000000 | 0.414781000000  |
| C | 0.000000000000  | -2.579751000000 | 0.202161000000  |
| H | 0.895354000000  | -2.728085000000 | -0.414646000000 |
| H | -0.895269000000 | -2.728041000000 | -0.414781000000 |
| H | -0.000078000000 | -3.359859000000 | 0.975390000000  |

**Table S11.** Optimized coordinates (wB97XD/6-31G(d,p)) of [Et<sub>4</sub>N]<sup>+</sup> cation in the singlet state. Units are in Å.

|   |                 |                 |                 |
|---|-----------------|-----------------|-----------------|
| C | -1.216145000000 | 0.000135000000  | 0.910024000000  |
| H | -1.114338000000 | 0.877308000000  | 1.550204000000  |
| H | -1.114336000000 | -0.876807000000 | 1.550523000000  |
| N | 0.000000000000  | 0.000000000000  | 0.000000000000  |
| C | -2.564584000000 | 0.000000000000  | 0.213657000000  |
| H | -3.331537000000 | 0.000376000000  | 0.991319000000  |
| H | -2.728870000000 | -0.890306000000 | -0.396620000000 |
| H | -2.728708000000 | 0.889851000000  | -0.397328000000 |
| C | 0.000135000000  | 1.216145000000  | -0.910024000000 |
| H | 0.877308000000  | 1.114338000000  | -1.550204000000 |
| H | -0.876807000000 | 1.114336000000  | -1.550523000000 |
| C | 0.000000000000  | -2.564584000000 | -0.213657000000 |
| H | -0.889851000000 | -2.728708000000 | 0.397328000000  |
| H | 0.890306000000  | -2.728870000000 | 0.396620000000  |
| H | -0.000376000000 | -3.331537000000 | -0.991319000000 |
| C | 1.216145000000  | -0.000135000000 | 0.910024000000  |
| H | 1.114336000000  | 0.876807000000  | 1.550523000000  |
| H | 1.114338000000  | -0.877308000000 | 1.550204000000  |
| C | -0.000135000000 | -1.216145000000 | -0.910024000000 |
| H | -0.877308000000 | -1.114338000000 | -1.550204000000 |
| H | 0.876807000000  | -1.114336000000 | -1.550523000000 |
| C | 0.000000000000  | 2.564584000000  | -0.213657000000 |
| H | -0.890306000000 | 2.728870000000  | 0.396620000000  |
| H | 0.000376000000  | 3.331537000000  | -0.991319000000 |
| H | 0.889851000000  | 2.728708000000  | 0.397328000000  |
| C | 2.564584000000  | 0.000000000000  | 0.213657000000  |
| H | 2.728870000000  | 0.890306000000  | -0.396620000000 |
| H | 2.728708000000  | -0.889851000000 | -0.397328000000 |
| H | 3.331537000000  | -0.000376000000 | 0.991319000000  |

**Table S12.** Optimized coordinates (M062-2X/6-31G(d,p)) of [Et<sub>4</sub>N]<sup>+</sup> cation in the singlet state. Units are in Å.

|   |                |                |                |
|---|----------------|----------------|----------------|
| C | 0.00002400000  | 1.21541700000  | 0.90948200000  |
| H | 0.87837200000  | 1.11141500000  | 1.54890500000  |
| H | -0.87827800000 | 1.11142100000  | 1.54897100000  |
| N | 0.00000000000  | 0.00000000000  | 0.00000000000  |
| C | 0.00000000000  | 2.55987500000  | 0.20566200000  |
| H | 0.00020200000  | 3.33178200000  | 0.97853600000  |
| H | -0.89053500000 | 2.71882300000  | -0.40594500000 |
| H | 0.89033100000  | 2.71869500000  | -0.40627900000 |
| C | 1.21541700000  | -0.00002400000 | -0.90948200000 |
| H | 1.11141500000  | -0.87837200000 | -1.54890500000 |
| H | 1.11142100000  | 0.87827800000  | -1.54897100000 |
| C | -2.55987500000 | 0.00000000000  | -0.20566200000 |
| H | -2.71869500000 | 0.89033100000  | 0.40627900000  |
| H | -2.71882300000 | -0.89053500000 | 0.40594500000  |
| H | -3.33178200000 | 0.00020200000  | -0.97853600000 |
| C | -0.00002400000 | -1.21541700000 | 0.90948200000  |
| H | 0.87827800000  | -1.11142100000 | 1.54897100000  |
| H | -0.87837200000 | -1.11141500000 | 1.54890500000  |
| C | -1.21541700000 | 0.00002400000  | -0.90948200000 |
| H | -1.11141500000 | 0.87837200000  | -1.54890500000 |
| H | -1.11142100000 | -0.87827800000 | -1.54897100000 |
| C | 2.55987500000  | 0.00000000000  | -0.20566200000 |
| H | 2.71882300000  | 0.89053500000  | 0.40594500000  |
| H | 3.33178200000  | -0.00020200000 | -0.97853600000 |
| H | 2.71869500000  | -0.89033100000 | 0.40627900000  |
| C | 0.00000000000  | -2.55987500000 | 0.20566200000  |
| H | 0.89053500000  | -2.71882300000 | -0.40594500000 |
| H | -0.89033100000 | -2.71869500000 | -0.40627900000 |
| H | -0.00020200000 | -3.33178200000 | 0.97853600000  |

**Table S13.** Optimized coordinates (B97D/6-31G(d,p)) of GO in the singlet state. Units are in Å.

|   |                 |                 |                 |
|---|-----------------|-----------------|-----------------|
| C | -6.281777000000 | -2.472003000000 | -0.188991000000 |
| C | -5.261023000000 | -1.466590000000 | -0.283689000000 |
| C | -3.949174000000 | -1.805874000000 | -0.547503000000 |
| C | -3.261040000000 | -3.106317000000 | -0.282395000000 |
| C | -1.699413000000 | -3.129827000000 | 0.221123000000  |
| C | -7.616426000000 | -2.114698000000 | -0.232087000000 |
| C | 2.609930000000  | -3.083225000000 | -0.253178000000 |
| C | 3.378048000000  | -2.009826000000 | 0.423956000000  |
| C | 4.882298000000  | -2.132305000000 | 0.343903000000  |
| C | 5.528902000000  | -3.248448000000 | 1.093788000000  |
| C | 6.865980000000  | -3.230109000000 | 1.366895000000  |
| C | 1.272274000000  | -3.000266000000 | -0.474172000000 |
| C | 2.778046000000  | -0.653721000000 | 0.434258000000  |
| C | 1.341199000000  | -0.512294000000 | -0.107367000000 |
| C | 0.833011000000  | 0.842797000000  | 0.434765000000  |
| C | 1.593084000000  | 1.995693000000  | 0.018719000000  |
| C | 2.971031000000  | 1.824260000000  | -0.319980000000 |
| C | 3.650266000000  | 0.607639000000  | 0.243342000000  |
| C | -0.338117000000 | 1.060935000000  | 1.140068000000  |
| C | 0.841259000000  | 3.187703000000  | -0.086234000000 |
| C | -1.079053000000 | 2.241742000000  | 0.928852000000  |
| C | 3.717124000000  | 2.880401000000  | -0.965532000000 |
| C | 0.509234000000  | -1.835992000000 | 0.020806000000  |
| C | -0.832591000000 | -1.888108000000 | 0.295355000000  |
| C | -1.526292000000 | -0.704559000000 | 0.792026000000  |
| C | -2.611477000000 | -0.164974000000 | 0.210835000000  |
| C | -3.346137000000 | 1.048176000000  | 0.611446000000  |
| C | -2.570637000000 | 2.326225000000  | 0.987260000000  |
| C | -3.243978000000 | 3.645333000000  | 0.721030000000  |
| C | -5.687166000000 | -0.012461000000 | 0.119467000000  |
| C | -7.115995000000 | 0.292027000000  | -0.345901000000 |
| C | -7.528857000000 | 1.658073000000  | -0.580856000000 |
| C | -6.638962000000 | 2.701841000000  | -0.620870000000 |
| C | -5.189532000000 | 2.513497000000  | -0.413559000000 |
| C | -4.677896000000 | 1.149199000000  | -0.147973000000 |
| C | -4.435409000000 | 3.697220000000  | 0.084499000000  |
| C | -8.019307000000 | -0.739265000000 | -0.400426000000 |
| C | 7.997139000000  | 0.233268000000  | 0.108597000000  |
| C | 7.280302000000  | 1.353686000000  | -0.617557000000 |
| C | 7.703725000000  | -2.093268000000 | 1.045936000000  |
| C | 7.182102000000  | -0.934251000000 | 0.482376000000  |
| C | 5.748607000000  | -0.936229000000 | 0.091355000000  |
| C | 5.111014000000  | 0.433254000000  | 0.070245000000  |
| C | 5.923576000000  | 1.478706000000  | -0.625864000000 |
| C | 5.235988000000  | 2.663427000000  | -1.232908000000 |
| O | 1.364048000000  | -0.360620000000 | -1.542315000000 |
| O | 9.020774000000  | -2.173079000000 | 1.341853000000  |
| O | -8.854271000000 | 1.855995000000  | -0.824684000000 |
| O | -3.075207000000 | -0.795013000000 | -0.934951000000 |
| H | 2.031222000000  | 0.321301000000  | -1.758779000000 |
| C | 8.214820000000  | 2.314994000000  | -1.313475000000 |
| O | 8.694560000000  | 2.069122000000  | -2.402912000000 |
| O | 8.502246000000  | 3.394310000000  | -0.552490000000 |
| H | 9.114247000000  | 3.943493000000  | -1.079216000000 |
| H | 9.218341000000  | -3.054156000000 | 1.698007000000  |
| C | -8.708690000000 | -3.137459000000 | -0.216947000000 |
| O | -9.898222000000 | -2.873377000000 | -0.319374000000 |
| O | -8.243631000000 | -4.411072000000 | -0.064145000000 |
| H | -9.031899000000 | -4.984610000000 | -0.073736000000 |
| C | 0.631232000000  | -3.969032000000 | -1.427639000000 |

|   |                 |                 |                 |
|---|-----------------|-----------------|-----------------|
| O | -0.336591000000 | -3.713839000000 | -2.125956000000 |
| O | 1.289945000000  | -5.159720000000 | -1.483282000000 |
| H | 0.829254000000  | -5.679893000000 | -2.167920000000 |
| C | -2.723876000000 | 4.931216000000  | 1.299702000000  |
| O | -3.073087000000 | 6.042701000000  | 0.939972000000  |
| O | -1.846811000000 | 4.710747000000  | 2.319251000000  |
| H | -1.582051000000 | 5.590730000000  | 2.647226000000  |
| O | 4.566579000000  | 0.843532000000  | 1.360352000000  |
| O | -4.513735000000 | 1.665258000000  | -1.462826000000 |
| O | -0.908379000000 | 0.003419000000  | 1.822100000000  |
| O | 4.676555000000  | -4.230437000000 | 1.477543000000  |
| H | 5.137708000000  | -4.863025000000 | 2.053157000000  |
| O | -5.684371000000 | -0.030565000000 | 1.574178000000  |
| H | -6.390241000000 | -0.640199000000 | 1.847716000000  |
| O | 5.377732000000  | -1.862557000000 | -0.988535000000 |
| H | -8.976136000000 | 2.803717000000  | -1.013401000000 |
| H | -4.921035000000 | 4.669700000000  | 0.006708000000  |
| H | 7.319365000000  | -4.079328000000 | 1.886224000000  |
| H | 3.178262000000  | -3.911176000000 | -0.668219000000 |
| H | -5.986724000000 | -3.517480000000 | -0.206835000000 |
| H | -9.070317000000 | -0.540552000000 | -0.595621000000 |
| H | 1.209401000000  | 4.108741000000  | -0.522186000000 |
| O | 5.842547000000  | 3.471830000000  | -1.926256000000 |
| O | 3.221452000000  | 3.956108000000  | -1.347677000000 |
| O | -0.458195000000 | 3.240520000000  | 0.268209000000  |
| O | -3.811547000000 | -4.194346000000 | -0.331155000000 |
| O | -7.154912000000 | 3.967201000000  | -0.867450000000 |
| H | -6.604378000000 | 4.412965000000  | -1.531457000000 |
| O | 9.205056000000  | 0.356745000000  | 0.337328000000  |
| O | 2.866066000000  | -1.404854000000 | 1.649356000000  |
| O | -1.309618000000 | -4.208720000000 | 0.624736000000  |
| O | -3.236384000000 | 1.493024000000  | 1.964792000000  |



**Table S14.** Optimized coordinates (wB97XD/6-31G(d,p)) of GO in the singlet state.

Units are in Å.

|   |                 |                 |                 |
|---|-----------------|-----------------|-----------------|
| C | 6.193337000000  | -2.476242000000 | 0.054075000000  |
| C | 5.179818000000  | -1.450541000000 | 0.218816000000  |
| C | 3.906745000000  | -1.772390000000 | 0.537242000000  |
| C | 3.204834000000  | -3.079597000000 | 0.316084000000  |
| C | 1.686862000000  | -3.097775000000 | -0.216244000000 |
| C | 7.499945000000  | -2.137218000000 | 0.135113000000  |
| C | -2.551295000000 | -3.062840000000 | 0.325069000000  |
| C | -3.326940000000 | -2.012270000000 | -0.377248000000 |
| C | -4.821756000000 | -2.137861000000 | -0.298018000000 |
| C | -5.455307000000 | -3.274056000000 | -1.015219000000 |
| C | -6.772469000000 | -3.274521000000 | -1.301792000000 |
| C | -1.233793000000 | -2.955302000000 | 0.538810000000  |
| C | -2.743824000000 | -0.662713000000 | -0.406897000000 |
| C | -1.323230000000 | -0.495345000000 | 0.128751000000  |
| C | -0.824605000000 | 0.855386000000  | -0.418950000000 |
| C | -1.582587000000 | 1.985220000000  | -0.001682000000 |
| C | -2.952519000000 | 1.792516000000  | 0.329158000000  |
| C | -3.614583000000 | 0.586084000000  | -0.249609000000 |
| C | 0.338516000000  | 1.081685000000  | -1.120501000000 |
| C | -0.835483000000 | 3.163763000000  | 0.128251000000  |
| C | 1.063157000000  | 2.245581000000  | -0.876698000000 |
| C | -3.701902000000 | 2.859399000000  | 0.913038000000  |
| C | -0.484808000000 | -1.798276000000 | 0.007627000000  |
| C | 0.827618000000  | -1.858324000000 | -0.297674000000 |
| C | 1.516381000000  | -0.670838000000 | -0.796615000000 |
| C | 2.577948000000  | -0.141163000000 | -0.207342000000 |
| C | 3.311575000000  | 1.075042000000  | -0.595592000000 |
| C | 2.554230000000  | 2.337684000000  | -0.946118000000 |
| C | 3.225690000000  | 3.641704000000  | -0.649359000000 |
| C | 5.618520000000  | -0.009617000000 | -0.152617000000 |
| C | 7.034531000000  | 0.255563000000  | 0.335436000000  |
| C | 7.461633000000  | 1.622677000000  | 0.598229000000  |
| C | 6.603251000000  | 2.657024000000  | 0.657823000000  |
| C | 5.150278000000  | 2.484017000000  | 0.458113000000  |
| C | 4.635828000000  | 1.146191000000  | 0.144998000000  |
| C | 4.403270000000  | 3.681757000000  | -0.018620000000 |
| C | 7.911709000000  | -0.765199000000 | 0.383924000000  |
| C | -7.927292000000 | 0.189349000000  | -0.146625000000 |
| C | -7.224749000000 | 1.335942000000  | 0.540454000000  |
| C | -7.615866000000 | -2.130607000000 | -1.015158000000 |
| C | -7.106112000000 | -0.975713000000 | -0.485355000000 |
| C | -5.685212000000 | -0.953805000000 | -0.084863000000 |
| C | -5.063198000000 | 0.409506000000  | -0.098748000000 |
| C | -5.888530000000 | 1.460272000000  | 0.557484000000  |
| C | -5.217053000000 | 2.662557000000  | 1.138134000000  |
| O | -1.353940000000 | -0.330707000000 | 1.537814000000  |
| O | -8.913284000000 | -2.223648000000 | -1.316471000000 |
| O | 8.779389000000  | 1.791056000000  | 0.821142000000  |
| O | 3.044731000000  | -0.772014000000 | 0.915746000000  |
| H | -2.005881000000 | 0.357422000000  | 1.746622000000  |
| C | -8.170355000000 | 2.319733000000  | 1.175151000000  |
| O | -8.666904000000 | 2.137455000000  | 2.255627000000  |
| O | -8.438600000000 | 3.350886000000  | 0.372150000000  |
| H | -9.053408000000 | 3.921567000000  | 0.854269000000  |
| H | -9.115952000000 | -3.101829000000 | -1.651921000000 |
| C | 8.579069000000  | -3.160228000000 | 0.064545000000  |
| O | 9.753685000000  | -2.911670000000 | 0.210524000000  |
| O | 8.119324000000  | -4.396178000000 | -0.184611000000 |
| H | 8.889977000000  | -4.979350000000 | -0.199049000000 |

|   |                 |                 |                 |
|---|-----------------|-----------------|-----------------|
| C | -0.570026000000 | -3.883243000000 | 1.502913000000  |
| O | 0.461885000000  | -3.643910000000 | 2.086437000000  |
| O | -1.271975000000 | -5.005713000000 | 1.708382000000  |
| H | -0.785807000000 | -5.509097000000 | 2.375600000000  |
| C | 2.703350000000  | 4.927128000000  | -1.202762000000 |
| O | 3.074354000000  | 6.021016000000  | -0.854148000000 |
| O | 1.798826000000  | 4.727841000000  | -2.174591000000 |
| H | 1.530670000000  | 5.600345000000  | -2.494755000000 |
| O | -4.504124000000 | 0.789973000000  | -1.362058000000 |
| O | 4.487356000000  | 1.643484000000  | 1.453681000000  |
| O | 0.904992000000  | 0.043028000000  | -1.801999000000 |
| O | -4.590958000000 | -4.244145000000 | -1.350073000000 |
| H | -5.013357000000 | -4.900877000000 | -1.913599000000 |
| O | 5.613462000000  | 0.019443000000  | -1.583489000000 |
| H | 6.360268000000  | -0.500620000000 | -1.899348000000 |
| O | -5.321397000000 | -1.830379000000 | 1.000687000000  |
| H | 8.921406000000  | 2.736526000000  | 0.964652000000  |
| H | 4.889368000000  | 4.645813000000  | 0.091258000000  |
| H | -7.215965000000 | -4.132090000000 | -1.803303000000 |
| H | -3.104450000000 | -3.884195000000 | 0.762913000000  |
| H | 5.886463000000  | -3.512801000000 | -0.017350000000 |
| H | 8.954598000000  | -0.584894000000 | 0.615922000000  |
| H | -1.202187000000 | 4.067571000000  | 0.590166000000  |
| O | -5.838282000000 | 3.489024000000  | 1.766216000000  |
| O | -3.220214000000 | 3.935551000000  | 1.268586000000  |
| O | 0.451319000000  | 3.211012000000  | -0.213467000000 |
| O | 3.740926000000  | -4.153056000000 | 0.419539000000  |
| O | 7.116382000000  | 3.916520000000  | 0.904236000000  |
| H | 6.796445000000  | 4.230687000000  | 1.757776000000  |
| O | -9.120804000000 | 0.293166000000  | -0.369568000000 |
| O | -2.821671000000 | -1.435842000000 | -1.586327000000 |
| O | 1.307802000000  | -4.162106000000 | -0.629868000000 |
| O | 3.195246000000  | 1.528070000000  | -1.923280000000 |

**Table S15.** Optimized coordinates (M062-2X/6-31G(d,p)) of GO in the singlet state.

Units are in Å.

|   |                 |                 |                 |
|---|-----------------|-----------------|-----------------|
| C | 6.207404000000  | -2.475105000000 | 0.013989000000  |
| C | 5.198499000000  | -1.450317000000 | 0.219426000000  |
| C | 3.931719000000  | -1.772086000000 | 0.560632000000  |
| C | 3.224057000000  | -3.078907000000 | 0.342434000000  |
| C | 1.692074000000  | -3.099276000000 | -0.150895000000 |
| C | 7.515136000000  | -2.129551000000 | 0.060540000000  |
| C | -2.552827000000 | -3.072756000000 | 0.327363000000  |
| C | -3.327774000000 | -2.021260000000 | -0.377035000000 |
| C | -4.820721000000 | -2.146458000000 | -0.290442000000 |
| C | -5.455058000000 | -3.291830000000 | -0.989720000000 |
| C | -6.779258000000 | -3.314044000000 | -1.240675000000 |
| C | -1.235363000000 | -2.961575000000 | 0.543401000000  |
| C | -2.744815000000 | -0.666713000000 | -0.401784000000 |
| C | -1.327875000000 | -0.498984000000 | 0.139123000000  |
| C | -0.824564000000 | 0.854911000000  | -0.398309000000 |
| C | -1.590738000000 | 1.987362000000  | 0.011219000000  |
| C | -2.966729000000 | 1.801781000000  | 0.307148000000  |
| C | -3.620007000000 | 0.581270000000  | -0.255725000000 |
| C | 0.345084000000  | 1.081064000000  | -1.087064000000 |
| C | -0.836869000000 | 3.165320000000  | 0.158721000000  |
| C | 1.069926000000  | 2.247161000000  | -0.837588000000 |
| C | -3.726800000000 | 2.887911000000  | 0.846504000000  |
| C | -0.484294000000 | -1.801167000000 | 0.022149000000  |
| C | 0.836170000000  | -1.857571000000 | -0.253666000000 |
| C | 1.531025000000  | -0.672959000000 | -0.752426000000 |
| C | 2.594820000000  | -0.143164000000 | -0.165980000000 |
| C | 3.324353000000  | 1.074074000000  | -0.560203000000 |
| C | 2.559408000000  | 2.340286000000  | -0.902133000000 |
| C | 3.229735000000  | 3.642108000000  | -0.593222000000 |
| C | 5.630122000000  | -0.007642000000 | -0.151764000000 |
| C | 7.055120000000  | 0.257522000000  | 0.310236000000  |
| C | 7.486011000000  | 1.621970000000  | 0.579672000000  |
| C | 6.629317000000  | 2.656231000000  | 0.660725000000  |
| C | 5.171639000000  | 2.484008000000  | 0.482174000000  |
| C | 4.653941000000  | 1.144150000000  | 0.166043000000  |
| C | 4.416164000000  | 3.684670000000  | 0.020322000000  |
| C | 7.937046000000  | -0.761185000000 | 0.319095000000  |
| C | -7.949532000000 | 0.161055000000  | -0.128950000000 |
| C | -7.244173000000 | 1.338499000000  | 0.499661000000  |
| C | -7.627722000000 | -2.173723000000 | -0.948956000000 |
| C | -7.118243000000 | -1.003136000000 | -0.458526000000 |
| C | -5.692847000000 | -0.961603000000 | -0.076199000000 |
| C | -5.075256000000 | 0.402860000000  | -0.112671000000 |
| C | -5.909617000000 | 1.470560000000  | 0.504995000000  |
| C | -5.250588000000 | 2.711969000000  | 1.022355000000  |
| O | -1.373170000000 | -0.345217000000 | 1.549589000000  |
| O | -8.933255000000 | -2.284243000000 | -1.216479000000 |
| O | 8.810106000000  | 1.784049000000  | 0.783445000000  |
| O | 3.072016000000  | -0.772793000000 | 0.957149000000  |
| H | -2.028369000000 | 0.339148000000  | 1.765675000000  |
| C | -8.193418000000 | 2.354411000000  | 1.080766000000  |
| O | -8.678827000000 | 2.245147000000  | 2.172731000000  |
| O | -8.472726000000 | 3.325566000000  | 0.208586000000  |
| H | -9.092301000000 | 3.927193000000  | 0.650204000000  |
| H | -9.137880000000 | -3.172362000000 | -1.530968000000 |
| C | 8.593348000000  | -3.151672000000 | -0.050484000000 |
| O | 9.768467000000  | -2.902842000000 | 0.065750000000  |
| O | 8.125032000000  | -4.385275000000 | -0.298680000000 |
| H | 8.893701000000  | -4.973714000000 | -0.340097000000 |

|   |                 |                 |                 |
|---|-----------------|-----------------|-----------------|
| C | -0.577961000000 | -3.885259000000 | 1.519767000000  |
| O | 0.427531000000  | -3.627183000000 | 2.134474000000  |
| O | -1.264736000000 | -5.023209000000 | 1.693825000000  |
| H | -0.791547000000 | -5.526468000000 | 2.373957000000  |
| C | 2.690870000000  | 4.931879000000  | -1.126192000000 |
| O | 3.063954000000  | 6.021208000000  | -0.775036000000 |
| O | 1.771069000000  | 4.734013000000  | -2.084547000000 |
| H | 1.493740000000  | 5.607768000000  | -2.401493000000 |
| O | -4.501756000000 | 0.761825000000  | -1.371341000000 |
| O | 4.526872000000  | 1.637700000000  | 1.474476000000  |
| O | 0.923448000000  | 0.041843000000  | -1.762066000000 |
| O | -4.577687000000 | -4.244775000000 | -1.347088000000 |
| H | -4.997964000000 | -4.907449000000 | -1.910120000000 |
| O | 5.599117000000  | 0.029137000000  | -1.581165000000 |
| H | 6.323482000000  | -0.518111000000 | -1.913281000000 |
| O | -5.311122000000 | -1.824838000000 | 1.004905000000  |
| H | 8.965085000000  | 2.729612000000  | 0.926458000000  |
| H | 4.898762000000  | 4.651719000000  | 0.128953000000  |
| H | -7.224158000000 | -4.179341000000 | -1.727155000000 |
| H | -3.106616000000 | -3.896646000000 | 0.763082000000  |
| H | 5.904749000000  | -3.513493000000 | -0.060032000000 |
| H | 8.986344000000  | -0.583820000000 | 0.526361000000  |
| H | -1.198052000000 | 4.071287000000  | 0.620312000000  |
| O | -5.890261000000 | 3.580228000000  | 1.565264000000  |
| O | -3.247385000000 | 3.964392000000  | 1.195202000000  |
| O | 0.452092000000  | 3.208282000000  | -0.173928000000 |
| O | 3.762541000000  | -4.150373000000 | 0.424604000000  |
| O | 7.142348000000  | 3.915772000000  | 0.904529000000  |
| H | 6.824091000000  | 4.234623000000  | 1.760483000000  |
| O | -9.148208000000 | 0.241690000000  | -0.318025000000 |
| O | -2.821310000000 | -1.440372000000 | -1.577658000000 |
| O | 1.294603000000  | -4.174700000000 | -0.508192000000 |
| O | 3.199663000000  | 1.534907000000  | -1.880253000000 |

**Table S16.** Optimized coordinates (B97D/6-31G(d,p)) of [Et<sub>4</sub>N]<sup>+</sup>-GO system in the singlet state.

Units are in Å.

|   |                 |                 |                 |
|---|-----------------|-----------------|-----------------|
| C | 6.042363000000  | -2.308611000000 | -0.739707000000 |
| C | 5.003966000000  | -1.330926000000 | -0.586137000000 |
| C | 3.694505000000  | -1.711473000000 | -0.373084000000 |
| C | 3.015897000000  | -2.986127000000 | -0.725915000000 |
| C | 1.429773000000  | -2.993068000000 | -1.146554000000 |
| C | 7.369200000000  | -1.931815000000 | -0.641357000000 |
| C | -2.863058000000 | -2.990824000000 | -0.523945000000 |
| C | -3.666884000000 | -1.870928000000 | -1.070703000000 |
| C | -5.161820000000 | -2.002625000000 | -0.889728000000 |
| C | -5.869994000000 | -3.049417000000 | -1.682767000000 |
| C | -7.223545000000 | -3.008799000000 | -1.846415000000 |
| C | -1.516507000000 | -2.917458000000 | -0.351347000000 |
| C | -3.062451000000 | -0.517417000000 | -1.009080000000 |
| C | -1.595392000000 | -0.408314000000 | -0.546349000000 |
| C | -1.114045000000 | 0.979329000000  | -1.025391000000 |
| C | -1.847397000000 | 2.096493000000  | -0.483025000000 |
| C | -3.187517000000 | 1.880570000000  | -0.037962000000 |
| C | -3.917970000000 | 0.718938000000  | -0.651925000000 |
| C | 0.019866000000  | 1.246906000000  | -1.774345000000 |
| C | -1.107535000000 | 3.294561000000  | -0.366876000000 |
| C | 0.765460000000  | 2.417557000000  | -1.527159000000 |
| C | -3.857803000000 | 2.847909000000  | 0.802827000000  |
| C | -0.772278000000 | -1.719804000000 | -0.788639000000 |
| C | 0.557789000000  | -1.750797000000 | -1.127227000000 |
| C | 1.223052000000  | -0.530319000000 | -1.576774000000 |
| C | 2.320324000000  | -0.022002000000 | -0.991548000000 |
| C | 3.045782000000  | 1.217876000000  | -1.312649000000 |
| C | 2.255815000000  | 2.509190000000  | -1.608639000000 |
| C | 2.919971000000  | 3.815648000000  | -1.269543000000 |
| C | 5.407064000000  | 0.159774000000  | -0.873660000000 |
| C | 6.823877000000  | 0.451997000000  | -0.366463000000 |
| C | 7.216155000000  | 1.804150000000  | -0.042032000000 |
| C | 6.308346000000  | 2.833406000000  | 0.055643000000  |
| C | 4.867668000000  | 2.638529000000  | -0.191038000000 |
| C | 4.375340000000  | 1.286522000000  | -0.540703000000 |
| C | 4.104614000000  | 3.841663000000  | -0.620925000000 |
| C | 7.744384000000  | -0.567554000000 | -0.369005000000 |
| C | -8.232344000000 | 0.309409000000  | -0.159346000000 |
| C | -7.449385000000 | 1.356627000000  | 0.612448000000  |
| C | -8.028336000000 | -1.910110000000 | -1.349599000000 |
| C | -7.456534000000 | -0.809489000000 | -0.718506000000 |
| C | -5.997027000000 | -0.839552000000 | -0.454497000000 |
| C | -5.357399000000 | 0.525456000000  | -0.363138000000 |
| C | -6.097563000000 | 1.494813000000  | 0.503332000000  |
| C | -5.354262000000 | 2.606682000000  | 1.173093000000  |
| O | -1.557660000000 | -0.338640000000 | 0.905286000000  |
| O | -9.361814000000 | -1.960097000000 | -1.540131000000 |
| O | 8.532898000000  | 1.999908000000  | 0.224270000000  |
| O | 2.806111000000  | -0.738968000000 | 0.095688000000  |
| H | -2.213388000000 | 0.341905000000  | 1.171079000000  |
| C | -8.312048000000 | 2.213986000000  | 1.508139000000  |
| O | -8.651545000000 | 1.826519000000  | 2.609131000000  |
| O | -8.695505000000 | 3.361057000000  | 0.914745000000  |
| H | -9.263181000000 | 3.832474000000  | 1.554955000000  |
| H | -9.604165000000 | -2.795728000000 | -1.971141000000 |
| C | 8.485505000000  | -2.934374000000 | -0.704381000000 |
| O | 9.661586000000  | -2.649582000000 | -0.542912000000 |
| O | 8.045634000000  | -4.194644000000 | -0.968881000000 |
| H | 8.838650000000  | -4.762135000000 | -0.995999000000 |

|   |                 |                 |                 |
|---|-----------------|-----------------|-----------------|
| C | -0.846365000000 | -3.960411000000 | 0.490701000000  |
| O | 0.085190000000  | -3.731423000000 | 1.256581000000  |
| O | -1.424521000000 | -5.176214000000 | 0.380112000000  |
| H | -0.953963000000 | -5.768710000000 | 0.996360000000  |
| C | 2.389183000000  | 5.131548000000  | -1.777717000000 |
| O | 2.731419000000  | 6.217534000000  | -1.345768000000 |
| O | 1.519836000000  | 4.957185000000  | -2.807877000000 |
| H | 1.251832000000  | 5.847831000000  | -3.104855000000 |
| O | -4.918137000000 | 1.046300000000  | -1.657091000000 |
| O | 4.181797000000  | 1.708467000000  | 0.808721000000  |
| O | 0.569917000000  | 0.233856000000  | -2.537660000000 |
| O | -5.049325000000 | -3.989743000000 | -2.212874000000 |
| H | -5.549306000000 | -4.572951000000 | -2.808435000000 |
| O | 5.412146000000  | 0.246188000000  | -2.321432000000 |
| H | 6.153904000000  | -0.294086000000 | -2.642713000000 |
| O | -5.530846000000 | -1.858761000000 | 0.503358000000  |
| H | 8.663424000000  | 2.938742000000  | 0.447845000000  |
| H | 4.578034000000  | 4.814382000000  | -0.489396000000 |
| H | -7.722069000000 | -3.806927000000 | -2.402974000000 |
| H | -3.408577000000 | -3.858695000000 | -0.161998000000 |
| H | 5.767354000000  | -3.357458000000 | -0.809143000000 |
| H | 8.789846000000  | -0.366065000000 | -0.147698000000 |
| H | -1.459038000000 | 4.194915000000  | 0.122252000000  |
| C | 1.450940000000  | -0.295547000000 | 5.304795000000  |
| H | 2.393491000000  | -0.216820000000 | 5.857831000000  |
| H | 0.853921000000  | -1.089965000000 | 5.765926000000  |
| N | 1.826856000000  | -0.812792000000 | 3.913438000000  |
| C | 0.693836000000  | 1.029821000000  | 5.317696000000  |
| H | 0.469534000000  | 1.273954000000  | 6.364804000000  |
| H | -0.259516000000 | 0.967354000000  | 4.778352000000  |
| H | 1.287892000000  | 1.855225000000  | 4.905243000000  |
| C | 2.769376000000  | 0.167149000000  | 3.203926000000  |
| H | 2.901239000000  | -0.223757000000 | 2.194515000000  |
| H | 2.212527000000  | 1.105702000000  | 3.117960000000  |
| C | -0.547597000000 | -1.787020000000 | 3.620534000000  |
| H | -0.953508000000 | -1.347653000000 | 4.541408000000  |
| H | -0.247113000000 | -2.825405000000 | 3.802836000000  |
| H | -1.343162000000 | -1.806779000000 | 2.867484000000  |
| C | 2.506243000000  | -2.173965000000 | 4.116217000000  |
| H | 3.307847000000  | -1.996545000000 | 4.842394000000  |
| H | 1.752209000000  | -2.809184000000 | 4.593231000000  |
| C | 0.580060000000  | -0.956347000000 | 3.020684000000  |
| H | 0.247112000000  | 0.064124000000  | 2.808408000000  |
| H | 0.923899000000  | -1.395517000000 | 2.081336000000  |
| C | 4.117105000000  | 0.387714000000  | 3.882531000000  |
| H | 4.027108000000  | 0.852185000000  | 4.873620000000  |
| H | 4.683207000000  | 1.065846000000  | 3.231471000000  |
| H | 4.694212000000  | -0.541833000000 | 3.972200000000  |
| C | 3.048559000000  | -2.826742000000 | 2.848058000000  |
| H | 3.813097000000  | -2.211692000000 | 2.358101000000  |
| H | 2.253819000000  | -3.067534000000 | 2.134567000000  |
| H | 3.522785000000  | -3.772063000000 | 3.145588000000  |
| O | -5.882661000000 | 3.336833000000  | 2.002078000000  |
| O | -3.301792000000 | 3.853555000000  | 1.278138000000  |
| O | 0.169210000000  | 3.378684000000  | -0.788634000000 |
| O | 3.578951000000  | -4.068730000000 | -0.777998000000 |
| O | 6.813608000000  | 4.080633000000  | 0.370246000000  |
| H | 6.210435000000  | 4.548522000000  | 0.968863000000  |
| O | -9.453607000000 | 0.449906000000  | -0.263935000000 |
| O | -3.221717000000 | -1.169874000000 | -2.269146000000 |
| O | 1.012160000000  | -4.064778000000 | -1.540076000000 |
| O | 2.920896000000  | 1.739771000000  | -2.634850000000 |



**Table S17.** Optimized coordinates (wB97XD/6-31G(d,p)) of [Et<sub>4</sub>N]<sup>+</sup>-GO system in the singlet state. Units are in Å.

|   |                |                |                |
|---|----------------|----------------|----------------|
| C | 5.96640000000  | -2.32294700000 | -0.88106300000 |
| C | 4.93621800000  | -1.32666900000 | -0.64577600000 |
| C | 3.67039500000  | -1.68932700000 | -0.34743700000 |
| C | 2.97302800000  | -2.97974300000 | -0.63063100000 |
| C | 1.41774100000  | -2.98630000000 | -1.04928800000 |
| C | 7.26400700000  | -1.96798500000 | -0.75573900000 |
| C | -2.80389200000 | -2.99329100000 | -0.40310800000 |
| C | -3.61180400000 | -1.89877300000 | -0.99246500000 |
| C | -5.09830800000 | -2.03223100000 | -0.82254800000 |
| C | -5.78453600000 | -3.11221300000 | -1.57667700000 |
| C | -7.11824400000 | -3.09432500000 | -1.76426300000 |
| C | -1.47972500000 | -2.89351100000 | -0.22131400000 |
| C | -3.02649400000 | -0.55028900000 | -0.95749600000 |
| C | -1.57980300000 | -0.41014600000 | -0.48937900000 |
| C | -1.10646600000 | 0.96754000000  | -0.98774300000 |
| C | -1.84090400000 | 2.06882000000  | -0.46279300000 |
| C | -3.17629500000 | 1.84264000000  | -0.03854100000 |
| C | -3.88469000000 | 0.68051000000  | -0.65522300000 |
| C | 0.02225100000  | 1.23160800000  | -1.73023200000 |
| C | -1.09284500000 | 3.24747000000  | -0.32081100000 |
| C | 0.75463400000  | 2.38630600000  | -1.46609600000 |
| C | -3.87393200000 | 2.85104900000  | 0.70209300000  |
| C | -0.74657800000 | -1.70493800000 | -0.70023600000 |
| C | 0.55620400000  | -1.74527100000 | -1.05933600000 |
| C | 1.21637700000  | -0.52847900000 | -1.52979900000 |
| C | 2.29597800000  | -0.02205400000 | -0.95395300000 |
| C | 3.01693500000  | 1.21627400000  | -1.28960100000 |
| C | 2.24333100000  | 2.48759200000  | -1.56953500000 |
| C | 2.90584800000  | 3.78192300000  | -1.21619100000 |
| C | 5.34987600000  | 0.14512300000  | -0.91940500000 |
| C | 6.75865700000  | 0.40072700000  | -0.40771100000 |
| C | 7.16846200000  | 1.75940900000  | -0.07856100000 |
| C | 6.29393900000  | 2.77743100000  | 0.03758800000  |
| C | 4.84496600000  | 2.59165500000  | -0.17511100000 |
| C | 4.34738300000  | 1.26574300000  | -0.55631300000 |
| C | 4.08231600000  | 3.80407300000  | -0.58454100000 |
| C | 7.65062100000  | -0.60842000000 | -0.41321500000 |
| C | -8.17481700000 | 0.25472400000  | -0.23148100000 |
| C | -7.41644100000 | 1.34494000000  | 0.49200800000  |
| C | -7.93607500000 | -1.98091300000 | -1.31914700000 |
| C | -7.38417200000 | -0.87180400000 | -0.73366300000 |
| C | -5.93783600000 | -0.87332500000 | -0.44688800000 |
| C | -5.31776100000 | 0.49036800000  | -0.40331400000 |
| C | -6.08371900000 | 1.48053600000  | 0.40280400000  |
| C | -5.36690500000 | 2.62792400000  | 1.03267500000  |
| O | -1.55838600000 | -0.30526400000 | 0.93380700000  |
| O | -9.24989400000 | -2.04927900000 | -1.52333600000 |
| O | 8.48261500000  | 1.93131900000  | 0.13640000000  |
| O | 2.79899300000  | -0.72308800000 | 0.11494800000  |
| H | -2.20827000000 | 0.37943000000  | 1.17615000000  |
| C | -8.30375000000 | 2.24942200000  | 1.30552100000  |
| O | -8.67657100000 | 1.95102700000  | 2.40926400000  |
| O | -8.66093100000 | 3.34214700000  | 0.63460600000  |
| H | -9.24138900000 | 3.85371500000  | 1.21626300000  |
| H | -9.49184000000 | -2.88990800000 | -1.92371700000 |
| C | 8.36836200000  | -2.96580500000 | -0.87918100000 |
| O | 9.52908500000  | -2.69854100000 | -0.68058300000 |
| O | 7.93509200000  | -4.18212900000 | -1.23313100000 |
| H | 8.71171200000  | -4.75608100000 | -1.28869600000 |

|   |                 |                 |                 |
|---|-----------------|-----------------|-----------------|
| C | -0.797247000000 | -3.892180000000 | 0.648904000000  |
| O | 0.168716000000  | -3.642682000000 | 1.344691000000  |
| O | -1.395827000000 | -5.079295000000 | 0.648606000000  |
| H | -0.912284000000 | -5.648948000000 | 1.262976000000  |
| C | 2.363496000000  | 5.090355000000  | -1.701923000000 |
| O | 2.725985000000  | 6.163688000000  | -1.291478000000 |
| O | 1.458210000000  | 4.924965000000  | -2.676049000000 |
| H | 1.181172000000  | 5.805196000000  | -2.968457000000 |
| O | -4.850446000000 | 0.962522000000  | -1.674685000000 |
| O | 4.188018000000  | 1.685890000000  | 0.783886000000  |
| O | 0.566619000000  | 0.224488000000  | -2.475964000000 |
| O | -4.943193000000 | -4.048855000000 | -2.043258000000 |
| H | -5.399472000000 | -4.664068000000 | -2.627594000000 |
| O | 5.337086000000  | 0.259382000000  | -2.342224000000 |
| H | 6.132023000000  | -0.153659000000 | -2.697348000000 |
| O | -5.484187000000 | -1.830314000000 | 0.535843000000  |
| H | 8.632016000000  | 2.873885000000  | 0.293422000000  |
| H | 4.559142000000  | 4.766287000000  | -0.428406000000 |
| H | -7.600717000000 | -3.910449000000 | -2.297190000000 |
| H | -3.337302000000 | -3.854595000000 | -0.019665000000 |
| H | 5.678437000000  | -3.356161000000 | -1.034272000000 |
| H | 8.690393000000  | -0.427054000000 | -0.167041000000 |
| H | -1.437137000000 | 4.127946000000  | 0.200568000000  |
| C | 1.458712000000  | -0.141587000000 | 5.262681000000  |
| H | 2.389174000000  | -0.076648000000 | 5.828567000000  |
| H | 0.839091000000  | -0.897588000000 | 5.746757000000  |
| N | 1.826476000000  | -0.702453000000 | 3.905172000000  |
| C | 0.749905000000  | 1.200844000000  | 5.249177000000  |
| H | 0.527104000000  | 1.466660000000  | 6.284927000000  |
| H | -0.199795000000 | 1.172433000000  | 4.711348000000  |
| H | 1.368195000000  | 2.000861000000  | 4.837132000000  |
| C | 2.774512000000  | 0.227559000000  | 3.172823000000  |
| H | 2.909567000000  | -0.193495000000 | 2.179021000000  |
| H | 2.238242000000  | 1.167324000000  | 3.038715000000  |
| C | -0.549531000000 | -1.642029000000 | 3.625313000000  |
| H | -0.973712000000 | -1.171680000000 | 4.515426000000  |
| H | -0.278962000000 | -2.675200000000 | 3.849050000000  |
| H | -1.328088000000 | -1.673221000000 | 2.861598000000  |
| C | 2.475522000000  | -2.050278000000 | 4.157050000000  |
| H | 3.274063000000  | -1.870910000000 | 4.878716000000  |
| H | 1.720741000000  | -2.659668000000 | 4.655307000000  |
| C | 0.596962000000  | -0.855280000000 | 3.021250000000  |
| H | 0.278008000000  | 0.154261000000  | 2.762057000000  |
| H | 0.929689000000  | -1.330802000000 | 2.098692000000  |
| C | 4.114803000000  | 0.470526000000  | 3.840334000000  |
| H | 4.031956000000  | 0.984985000000  | 4.800600000000  |
| H | 4.683287000000  | 1.110257000000  | 3.162330000000  |
| H | 4.693104000000  | -0.445981000000 | 3.977355000000  |
| C | 3.008659000000  | -2.767399000000 | 2.930311000000  |
| H | 3.798209000000  | -2.206726000000 | 2.424860000000  |
| H | 2.218581000000  | -3.020107000000 | 2.221219000000  |
| H | 3.448077000000  | -3.708594000000 | 3.268960000000  |
| O | -5.922661000000 | 3.391542000000  | 1.787324000000  |
| O | -3.350380000000 | 3.882669000000  | 1.119191000000  |
| O | 0.170525000000  | 3.317409000000  | -0.730764000000 |
| O | 3.520505000000  | -4.052545000000 | -0.617684000000 |
| O | 6.793964000000  | 4.034214000000  | 0.305975000000  |
| H | 6.497118000000  | 4.333653000000  | 1.172642000000  |
| O | -9.381063000000 | 0.370372000000  | -0.343369000000 |
| O | -3.163766000000 | -1.239508000000 | -2.179883000000 |
| O | 0.996952000000  | -4.057064000000 | -1.399458000000 |
| O | 2.873961000000  | 1.729225000000  | -2.590841000000 |

**Table S18.** Optimized coordinates (M06-2X/6-31G(d,p)) of [Et<sub>4</sub>N]<sup>+</sup>-GO system in the singlet state. Units are in Å.

|   |                 |                 |                 |
|---|-----------------|-----------------|-----------------|
| C | 6.003055000000  | -2.313545000000 | -0.985218000000 |
| C | 4.980093000000  | -1.328232000000 | -0.674184000000 |
| C | 3.727071000000  | -1.697012000000 | -0.333010000000 |
| C | 3.020556000000  | -2.985025000000 | -0.616013000000 |
| C | 1.435925000000  | -2.999305000000 | -0.915176000000 |
| C | 7.302905000000  | -1.947251000000 | -0.909855000000 |
| C | -2.792129000000 | -3.000945000000 | -0.334705000000 |
| C | -3.595302000000 | -1.920052000000 | -0.957972000000 |
| C | -5.081474000000 | -2.055458000000 | -0.800884000000 |
| C | -5.750707000000 | -3.164459000000 | -1.525676000000 |
| C | -7.085594000000 | -3.178322000000 | -1.703902000000 |
| C | -1.470147000000 | -2.889411000000 | -0.140385000000 |
| C | -3.014405000000 | -0.564253000000 | -0.932363000000 |
| C | -1.576395000000 | -0.411754000000 | -0.445392000000 |
| C | -1.098497000000 | 0.963682000000  | -0.944518000000 |
| C | -1.851131000000 | 2.072934000000  | -0.450867000000 |
| C | -3.201859000000 | 1.860346000000  | -0.084564000000 |
| C | -3.885373000000 | 0.669100000000  | -0.676837000000 |
| C | 0.043418000000  | 1.220213000000  | -1.666118000000 |
| C | -1.094915000000 | 3.250791000000  | -0.291311000000 |
| C | 0.774489000000  | 2.378710000000  | -1.399207000000 |
| C | -3.931235000000 | 2.903296000000  | 0.580019000000  |
| C | -0.733065000000 | -1.707248000000 | -0.629801000000 |
| C | 0.579305000000  | -1.753001000000 | -0.961313000000 |
| C | 1.247162000000  | -0.544047000000 | -1.444367000000 |
| C | 2.333366000000  | -0.036298000000 | -0.880818000000 |
| C | 3.044865000000  | 1.205826000000  | -1.227918000000 |
| C | 2.262102000000  | 2.480211000000  | -1.492616000000 |
| C | 2.923437000000  | 3.769363000000  | -1.117078000000 |
| C | 5.381229000000  | 0.148468000000  | -0.931402000000 |
| C | 6.804453000000  | 0.403311000000  | -0.461657000000 |
| C | 7.215277000000  | 1.755122000000  | -0.107975000000 |
| C | 6.338880000000  | 2.764602000000  | 0.059500000000  |
| C | 4.883324000000  | 2.575443000000  | -0.118371000000 |
| C | 4.385720000000  | 1.252698000000  | -0.519489000000 |
| C | 4.106122000000  | 3.791763000000  | -0.496615000000 |
| C | 7.703491000000  | -0.597499000000 | -0.539243000000 |
| C | -8.197755000000 | 0.210693000000  | -0.298010000000 |
| C | -7.456934000000 | 1.353838000000  | 0.357108000000  |
| C | -7.919196000000 | -2.062325000000 | -1.291557000000 |
| C | -7.383876000000 | -0.921873000000 | -0.756720000000 |
| C | -5.939243000000 | -0.891321000000 | -0.462103000000 |
| C | -5.330126000000 | 0.477951000000  | -0.457183000000 |
| C | -6.125955000000 | 1.500684000000  | 0.277482000000  |
| C | -5.442241000000 | 2.708425000000  | 0.835159000000  |
| O | -1.579464000000 | -0.300503000000 | 0.979588000000  |
| O | -9.234851000000 | -2.158884000000 | -1.485104000000 |
| O | 8.536956000000  | 1.926345000000  | 0.072825000000  |
| O | 2.864021000000  | -0.741111000000 | 0.177454000000  |
| H | -2.243502000000 | 0.372602000000  | 1.217612000000  |
| C | -8.368258000000 | 2.309828000000  | 1.084915000000  |
| O | -8.745276000000 | 2.109908000000  | 2.206026000000  |
| O | -8.735065000000 | 3.329214000000  | 0.310377000000  |
| H | -9.333045000000 | 3.885999000000  | 0.834029000000  |
| H | -9.467752000000 | -3.019097000000 | -1.854063000000 |
| C | 8.405854000000  | -2.934818000000 | -1.114976000000 |
| O | 9.570822000000  | -2.663905000000 | -0.969341000000 |
| O | 7.959529000000  | -4.144779000000 | -1.477073000000 |
| H | 8.734584000000  | -4.716757000000 | -1.589170000000 |

|   |                 |                 |                 |
|---|-----------------|-----------------|-----------------|
| C | -0.798115000000 | -3.856961000000 | 0.775185000000  |
| O | 0.123256000000  | -3.564007000000 | 1.510525000000  |
| O | -1.363238000000 | -5.059928000000 | 0.764160000000  |
| H | -0.896469000000 | -5.612601000000 | 1.410262000000  |
| C | 2.364931000000  | 5.083958000000  | -1.573522000000 |
| O | 2.720568000000  | 6.149445000000  | -1.145008000000 |
| O | 1.456939000000  | 4.926101000000  | -2.547147000000 |
| H | 1.171680000000  | 5.809530000000  | -2.830950000000 |
| O | -4.826029000000 | 0.905844000000  | -1.724903000000 |
| O | 4.257398000000  | 1.646523000000  | 0.829210000000  |
| O | 0.600109000000  | 0.206343000000  | -2.396723000000 |
| O | -4.886541000000 | -4.090686000000 | -1.977173000000 |
| H | -5.327909000000 | -4.725529000000 | -2.556760000000 |
| O | 5.325140000000  | 0.292059000000  | -2.349920000000 |
| H | 6.092285000000  | -0.149115000000 | -2.739865000000 |
| O | -5.481748000000 | -1.812062000000 | 0.543220000000  |
| H | 8.695333000000  | 2.867787000000  | 0.240726000000  |
| H | 4.575859000000  | 4.756804000000  | -0.329697000000 |
| H | -7.556628000000 | -4.016085000000 | -2.212787000000 |
| H | -3.328097000000 | -3.857274000000 | 0.060669000000  |
| H | 5.720148000000  | -3.346030000000 | -1.155904000000 |
| H | 8.752930000000  | -0.419186000000 | -0.331853000000 |
| H | -1.439719000000 | 4.138866000000  | 0.216454000000  |
| C | 1.415786000000  | -0.258665000000 | 5.343565000000  |
| H | 2.359002000000  | -0.233794000000 | 5.892089000000  |
| H | 0.808867000000  | -1.057352000000 | 5.773764000000  |
| N | 1.756506000000  | -0.704545000000 | 3.938393000000  |
| C | 0.703081000000  | 1.078236000000  | 5.440279000000  |
| H | 0.475217000000  | 1.258214000000  | 6.492965000000  |
| H | -0.243025000000 | 1.090832000000  | 4.895497000000  |
| H | 1.323280000000  | 1.908634000000  | 5.097032000000  |
| C | 2.677079000000  | 0.291439000000  | 3.260048000000  |
| H | 2.816247000000  | -0.066950000000 | 2.240561000000  |
| H | 2.117914000000  | 1.226475000000  | 3.197511000000  |
| C | -0.634912000000 | -1.601703000000 | 3.685341000000  |
| H | -1.054286000000 | -1.130221000000 | 4.577188000000  |
| H | -0.356670000000 | -2.632862000000 | 3.908798000000  |
| H | -1.416003000000 | -1.642952000000 | 2.923902000000  |
| C | 2.424171000000  | -2.061333000000 | 4.063845000000  |
| H | 3.198519000000  | -1.947864000000 | 4.825178000000  |
| H | 1.663631000000  | -2.732168000000 | 4.465693000000  |
| C | 0.504497000000  | -0.806164000000 | 3.076495000000  |
| H | 0.194759000000  | 0.219427000000  | 2.869997000000  |
| H | 0.812967000000  | -1.250512000000 | 2.127966000000  |
| C | 4.013498000000  | 0.509562000000  | 3.945016000000  |
| H | 3.919510000000  | 0.986974000000  | 4.923092000000  |
| H | 4.590952000000  | 1.172742000000  | 3.297643000000  |
| H | 4.587500000000  | -0.413639000000 | 4.053797000000  |
| C | 3.006281000000  | -2.621173000000 | 2.779030000000  |
| H | 3.823336000000  | -2.008932000000 | 2.389870000000  |
| H | 2.240645000000  | -2.757803000000 | 2.012246000000  |
| H | 3.413265000000  | -3.609227000000 | 3.006147000000  |
| O | -6.040628000000 | 3.536318000000  | 1.477069000000  |
| O | -3.421742000000 | 3.944957000000  | 0.980995000000  |
| O | 0.176542000000  | 3.310761000000  | -0.676405000000 |
| O | 3.574587000000  | -4.049973000000 | -0.677106000000 |
| O | 6.835710000000  | 4.019533000000  | 0.341788000000  |
| H | 6.557231000000  | 4.302712000000  | 1.223355000000  |
| O | -9.405509000000 | 0.292224000000  | -0.396906000000 |
| O | -3.130856000000 | -1.275861000000 | -2.141282000000 |
| O | 0.987054000000  | -4.089095000000 | -1.146564000000 |
| O | 2.888115000000  | 1.729453000000  | -2.519373000000 |

**Table S19.** Optimized coordinates (B3LYP\*/6-31G(d,p)) of [Et<sub>4</sub>N][Fe(5Cl-thsa)<sub>2</sub>] complex in the sextet (HS) state. Units are in Å.

|    |                 |                 |                 |
|----|-----------------|-----------------|-----------------|
| Fe | -0.190627000000 | -1.234875000000 | 0.366008000000  |
| S  | 1.077340000000  | -3.331475000000 | 0.250783000000  |
| O  | -1.529681000000 | 0.192171000000  | 0.048074000000  |
| N  | -1.462422000000 | -2.451773000000 | -0.935909000000 |
| N  | -1.063005000000 | -3.670588000000 | -1.429880000000 |
| N  | 0.528667000000  | -5.298882000000 | -1.469603000000 |
| C  | -2.807884000000 | 0.158039000000  | -0.246813000000 |
| C  | -3.656213000000 | 1.235301000000  | 0.112219000000  |
| C  | -4.995418000000 | 1.277759000000  | -0.254945000000 |
| C  | -5.537761000000 | 0.223890000000  | -1.000086000000 |
| C  | -4.756016000000 | -0.868380000000 | -1.340217000000 |
| C  | -3.398278000000 | -0.934084000000 | -0.959926000000 |
| C  | -2.669939000000 | -2.125153000000 | -1.313224000000 |
| C  | 0.078824000000  | -4.111321000000 | -0.953193000000 |
| H  | -3.235269000000 | 2.030140000000  | 0.720391000000  |
| H  | -5.624555000000 | 2.114381000000  | 0.038222000000  |
| H  | -5.191572000000 | -1.694757000000 | -1.896977000000 |
| H  | -3.188744000000 | -2.855801000000 | -1.939990000000 |
| H  | 1.219973000000  | -5.800636000000 | -0.931200000000 |
| H  | -0.160362000000 | -5.850406000000 | -1.966387000000 |
| S  | -1.332544000000 | -1.632447000000 | 2.537359000000  |
| O  | 0.994718000000  | -0.243756000000 | -0.860272000000 |
| N  | 1.367462000000  | -0.648385000000 | 1.855976000000  |
| N  | 1.138525000000  | -0.625296000000 | 3.209074000000  |
| N  | -0.322422000000 | -0.981674000000 | 4.918220000000  |
| C  | 2.304999000000  | -0.292202000000 | -0.962496000000 |
| C  | 2.923356000000  | -0.183225000000 | -2.232003000000 |
| C  | 4.305270000000  | -0.153388000000 | -2.370630000000 |
| C  | 5.116149000000  | -0.222622000000 | -1.228589000000 |
| C  | 4.552417000000  | -0.336343000000 | 0.032003000000  |
| C  | 3.149425000000  | -0.382199000000 | 0.191135000000  |
| C  | 2.621836000000  | -0.470469000000 | 1.531895000000  |
| C  | -0.060432000000 | -1.048307000000 | 3.569866000000  |
| H  | 2.277705000000  | -0.141977000000 | -3.106143000000 |
| H  | 4.761563000000  | -0.081248000000 | -3.354469000000 |
| H  | 5.191536000000  | -0.400829000000 | 0.909744000000  |
| H  | 3.333579000000  | -0.383831000000 | 2.358908000000  |
| H  | -1.076124000000 | -1.565433000000 | 5.253831000000  |
| H  | 0.497562000000  | -0.923866000000 | 5.511110000000  |
| Cl | 6.873127000000  | -0.165291000000 | -1.403616000000 |
| Cl | -7.233717000000 | 0.283173000000  | -1.489890000000 |
| C  | 0.559720000000  | 2.543062000000  | 1.120022000000  |
| H  | 1.193909000000  | 1.754941000000  | 0.716579000000  |
| H  | -0.438641000000 | 2.103497000000  | 1.182264000000  |
| N  | 0.483925000000  | 3.610068000000  | 0.016949000000  |
| C  | 1.059645000000  | 3.006935000000  | 2.478538000000  |
| H  | 1.093962000000  | 2.112140000000  | 3.112754000000  |
| H  | 0.394672000000  | 3.730499000000  | 2.963200000000  |
| H  | 2.073319000000  | 3.422353000000  | 2.449881000000  |
| C  | 1.861970000000  | 4.201493000000  | -0.278556000000 |

|   |                 |                |                 |
|---|-----------------|----------------|-----------------|
| H | 1.696607000000  | 4.976352000000 | -1.032830000000 |
| H | 2.169146000000  | 4.706214000000 | 0.641688000000  |
| C | -1.824710000000 | 4.468801000000 | 0.811423000000  |
| H | -1.895900000000 | 3.794010000000 | 1.669407000000  |
| H | -2.392348000000 | 4.040082000000 | -0.018807000000 |
| H | -2.310914000000 | 5.410034000000 | 1.092575000000  |
| C | -0.095033000000 | 2.892104000000 | -1.211968000000 |
| H | 0.541412000000  | 2.019670000000 | -1.381924000000 |
| H | -1.053918000000 | 2.479485000000 | -0.892327000000 |
| C | -0.385370000000 | 4.789177000000 | 0.439856000000  |
| H | 0.131570000000  | 5.252169000000 | 1.285142000000  |
| H | -0.352596000000 | 5.501021000000 | -0.389684000000 |
| C | 2.937181000000  | 3.228531000000 | -0.735803000000 |
| H | 3.180844000000  | 2.473592000000 | 0.015955000000  |
| H | 3.846293000000  | 3.812039000000 | -0.921966000000 |
| H | 2.684668000000  | 2.708819000000 | -1.663826000000 |
| C | -0.239782000000 | 3.744437000000 | -2.463969000000 |
| H | 0.717039000000  | 4.107708000000 | -2.854131000000 |
| H | -0.914780000000 | 4.597713000000 | -2.333935000000 |
| H | -0.679169000000 | 3.104805000000 | -3.237397000000 |



**Table S20.** Optimized coordinates (B3LYP\*/6-31G(d,p)) of [Et<sub>4</sub>N][Fe(5Cl-thsa)<sub>2</sub>] complex in the doublet (LS) state. Units are in Å.

|    |                 |                 |                 |
|----|-----------------|-----------------|-----------------|
| Fe | -0.121648000000 | -1.638866000000 | 0.192796000000  |
| S  | 1.148770000000  | -3.443881000000 | -0.387429000000 |
| O  | -1.213592000000 | -0.103299000000 | 0.665174000000  |
| N  | -1.187277000000 | -2.067911000000 | -1.385184000000 |
| N  | -0.767601000000 | -3.024374000000 | -2.286022000000 |
| N  | 0.787597000000  | -4.631335000000 | -2.763179000000 |
| C  | -2.445925000000 | 0.088794000000  | 0.253161000000  |
| C  | -3.293037000000 | 0.947296000000  | 1.001747000000  |
| C  | -4.572963000000 | 1.289409000000  | 0.578717000000  |
| C  | -5.059577000000 | 0.763714000000  | -0.623655000000 |
| C  | -4.290097000000 | -0.121686000000 | -1.362451000000 |
| C  | -2.996220000000 | -0.492135000000 | -0.937959000000 |
| C  | -2.298521000000 | -1.478788000000 | -1.724818000000 |
| C  | 0.299175000000  | -3.683300000000 | -1.901794000000 |
| H  | -2.913606000000 | 1.316123000000  | 1.951804000000  |
| H  | -5.199073000000 | 1.944745000000  | 1.179154000000  |
| H  | -4.690569000000 | -0.554145000000 | -2.276544000000 |
| H  | -2.755792000000 | -1.807825000000 | -2.660071000000 |
| H  | 1.394174000000  | -5.337285000000 | -2.370631000000 |
| H  | 0.144766000000  | -4.938246000000 | -3.482882000000 |
| S  | -1.399423000000 | -2.870907000000 | 1.640605000000  |
| O  | 0.945728000000  | -0.525205000000 | -0.978519000000 |
| N  | 0.991921000000  | -1.249795000000 | 1.743329000000  |
| N  | 0.569343000000  | -1.564551000000 | 3.016445000000  |
| N  | -1.011911000000 | -2.626141000000 | 4.280107000000  |
| C  | 2.222104000000  | -0.283771000000 | -0.800161000000 |
| C  | 3.018435000000  | 0.065735000000  | -1.922631000000 |
| C  | 4.358357000000  | 0.410152000000  | -1.801379000000 |
| C  | 4.952813000000  | 0.423813000000  | -0.531641000000 |
| C  | 4.222390000000  | 0.067685000000  | 0.591730000000  |
| C  | 2.863709000000  | -0.307107000000 | 0.484865000000  |
| C  | 2.177486000000  | -0.704540000000 | 1.692094000000  |
| C  | -0.524857000000 | -2.294723000000 | 3.041893000000  |
| H  | 2.540808000000  | 0.036144000000  | -2.899287000000 |
| H  | 4.947905000000  | 0.662082000000  | -2.679260000000 |
| H  | 4.702148000000  | 0.054376000000  | 1.568101000000  |
| H  | 2.699423000000  | -0.587309000000 | 2.644717000000  |
| H  | -1.656760000000 | -3.402753000000 | 4.322018000000  |
| H  | -0.351516000000 | -2.548348000000 | 5.043865000000  |
| Cl | 6.651785000000  | 0.887216000000  | -0.365979000000 |
| Cl | -6.674606000000 | 1.212652000000  | -1.185517000000 |
| C  | 0.593256000000  | 2.568203000000  | 1.262180000000  |
| H  | 1.351495000000  | 1.883020000000  | 0.879183000000  |
| H  | -0.308150000000 | 1.962443000000  | 1.390892000000  |
| N  | 0.305267000000  | 3.545219000000  | 0.113364000000  |
| C  | 1.054151000000  | 3.200844000000  | 2.567028000000  |
| H  | 1.238268000000  | 2.378997000000  | 3.267860000000  |
| H  | 0.302573000000  | 3.852643000000  | 3.024686000000  |
| H  | 1.992590000000  | 3.758329000000  | 2.470829000000  |
| C  | 1.575449000000  | 4.280038000000  | -0.315826000000 |
| H  | 1.258881000000  | 4.992520000000  | -1.083024000000 |
| H  | 1.888838000000  | 4.861434000000  | 0.555899000000  |
| C  | -2.001994000000 | 4.181123000000  | 1.115322000000  |
| H  | -1.879099000000 | 3.632840000000  | 2.053349000000  |
| H  | -2.587834000000 | 3.559310000000  | 0.434017000000  |
| H  | -2.590029000000 | 5.080398000000  | 1.333416000000  |
| C  | -0.269674000000 | 2.691026000000  | -1.028545000000 |
| H  | 0.406151000000  | 1.840290000000  | -1.152038000000 |

|   |                 |                |                 |
|---|-----------------|----------------|-----------------|
| H | -1.201345000000 | 2.274210000000 | -0.642556000000 |
| C | -0.675181000000 | 4.639166000000 | 0.531580000000  |
| H | -0.136380000000 | 5.259327000000 | 1.253688000000  |
| H | -0.837885000000 | 5.249769000000 | -0.360863000000 |
| C | 2.718792000000  | 3.417822000000 | -0.822526000000 |
| H | 3.115679000000  | 2.734877000000 | -0.066644000000 |
| H | 3.533522000000  | 4.091871000000 | -1.111689000000 |
| H | 2.453767000000  | 2.825333000000 | -1.700923000000 |
| C | -0.501546000000 | 3.417334000000 | -2.345432000000 |
| H | 0.421744000000  | 3.783657000000 | -2.806224000000 |
| H | -1.212756000000 | 4.246985000000 | -2.267493000000 |
| H | -0.938277000000 | 2.687183000000 | -3.035673000000 |

**Table S21.** Optimized coordinates (wB97XD/6-31G(d,p)) of [Et<sub>4</sub>N][Fe(5Cl-thsa)<sub>2</sub>] complex in the sextet (HS) state. Units are in Å.

|    |                 |                 |                 |
|----|-----------------|-----------------|-----------------|
| Fe | -0.027784000000 | -1.369048000000 | 0.426599000000  |
| S  | 1.134764000000  | -3.429029000000 | -0.068215000000 |
| O  | -1.446910000000 | -0.051589000000 | 0.513606000000  |
| N  | -1.046244000000 | -2.026755000000 | -1.366747000000 |
| N  | -0.359091000000 | -2.798903000000 | -2.272710000000 |
| N  | 1.440899000000  | -4.137154000000 | -2.614423000000 |
| C  | -2.703038000000 | -0.102076000000 | 0.151230000000  |
| C  | -3.668039000000 | 0.644658000000  | 0.857941000000  |
| C  | -4.988127000000 | 0.699965000000  | 0.446896000000  |
| C  | -5.382667000000 | 0.000695000000  | -0.694166000000 |
| C  | -4.471470000000 | -0.766602000000 | -1.394366000000 |
| C  | -3.133986000000 | -0.843903000000 | -0.979829000000 |
| C  | -2.230766000000 | -1.684821000000 | -1.742740000000 |
| C  | 0.671927000000  | -3.414047000000 | -1.753266000000 |
| H  | -3.345300000000 | 1.160236000000  | 1.756291000000  |
| H  | -5.716439000000 | 1.274977000000  | 1.008461000000  |
| H  | -4.793109000000 | -1.323607000000 | -2.269016000000 |
| H  | -2.582411000000 | -2.076517000000 | -2.699279000000 |
| H  | 2.071932000000  | -4.814114000000 | -2.221448000000 |
| H  | 1.035653000000  | -4.337734000000 | -3.515421000000 |
| S  | -0.922994000000 | -2.364897000000 | 2.498864000000  |
| O  | 1.167437000000  | -0.330567000000 | -0.738159000000 |
| N  | 1.162204000000  | -0.439881000000 | 1.978699000000  |
| N  | 0.598336000000  | -0.211629000000 | 3.213699000000  |
| N  | -1.066136000000 | -0.792076000000 | 4.644233000000  |
| C  | 2.468794000000  | -0.225294000000 | -0.644998000000 |
| C  | 3.255618000000  | -0.187400000000 | -1.815169000000 |
| C  | 4.618398000000  | 0.032328000000  | -1.761116000000 |
| C  | 5.240663000000  | 0.225714000000  | -0.524436000000 |
| C  | 4.507934000000  | 0.173872000000  | 0.643778000000  |
| C  | 3.124410000000  | -0.064388000000 | 0.605326000000  |
| C  | 2.389927000000  | -0.064312000000 | 1.855453000000  |
| C  | -0.402253000000 | -1.020944000000 | 3.474636000000  |
| H  | 2.752770000000  | -0.345616000000 | -2.763172000000 |
| H  | 5.209022000000  | 0.054244000000  | -2.670687000000 |
| H  | 5.001609000000  | 0.311812000000  | 1.600972000000  |
| H  | 2.894193000000  | 0.307418000000  | 2.750288000000  |
| H  | -1.650710000000 | -1.533980000000 | 4.990689000000  |
| H  | -0.582753000000 | -0.227358000000 | 5.325759000000  |
| Cl | 6.965921000000  | 0.532119000000  | -0.462020000000 |
| Cl | -7.048969000000 | 0.088260000000  | -1.232438000000 |
| C  | 0.284083000000  | 2.427334000000  | 0.867108000000  |
| H  | 1.007247000000  | 1.690550000000  | 0.530567000000  |
| H  | -0.617517000000 | 1.852123000000  | 1.080567000000  |
| N  | -0.018749000000 | 3.275539000000  | -0.356025000000 |
| C  | 0.784221000000  | 3.161662000000  | 2.092621000000  |
| H  | 0.895573000000  | 2.396756000000  | 2.868340000000  |
| H  | 0.077249000000  | 3.906953000000  | 2.468313000000  |
| H  | 1.757650000000  | 3.637405000000  | 1.944245000000  |
| C  | 1.217658000000  | 4.009347000000  | -0.823808000000 |
| H  | 0.901902000000  | 4.631826000000  | -1.663594000000 |
| H  | 1.495506000000  | 4.682379000000  | -0.010617000000 |
| C  | -2.351457000000 | 3.838684000000  | 0.547854000000  |
| H  | -2.204220000000 | 3.374247000000  | 1.524371000000  |
| H  | -2.876477000000 | 3.127202000000  | -0.091708000000 |
| H  | -3.004565000000 | 4.703876000000  | 0.686172000000  |
| C  | -0.523352000000 | 2.305438000000  | -1.415624000000 |

|   |                 |                |                 |
|---|-----------------|----------------|-----------------|
| H | 0.200551000000  | 1.488038000000 | -1.455001000000 |
| H | -1.431926000000 | 1.866546000000 | -1.008041000000 |
| C | -1.049773000000 | 4.336517000000 | -0.050576000000 |
| H | -0.568056000000 | 5.042520000000 | 0.628742000000  |
| H | -1.232966000000 | 4.863906000000 | -0.988369000000 |
| C | 2.395365000000  | 3.136752000000 | -1.213853000000 |
| H | 2.798477000000  | 2.568247000000 | -0.373836000000 |
| H | 3.188330000000  | 3.793901000000 | -1.578848000000 |
| H | 2.154360000000  | 2.431838000000 | -2.010935000000 |
| C | -0.770262000000 | 2.904422000000 | -2.786570000000 |
| H | 0.140218000000  | 3.281603000000 | -3.258792000000 |
| H | -1.525324000000 | 3.694982000000 | -2.786818000000 |
| H | -1.150214000000 | 2.098626000000 | -3.418956000000 |

**Table S22.** Optimized coordinates (wB97XD/6-31G(d,p)) of [Et<sub>4</sub>N][Fe(5Cl-thsa)<sub>2</sub>] complex in the doublet (LS) state. Units are in Å.

|    |                 |                 |                 |
|----|-----------------|-----------------|-----------------|
| Fe | -0.044873000000 | -1.562008000000 | 0.229226000000  |
| S  | 1.320303000000  | -3.286984000000 | -0.307554000000 |
| O  | -1.236987000000 | -0.123134000000 | 0.664816000000  |
| N  | -1.039656000000 | -2.048406000000 | -1.382628000000 |
| N  | -0.508081000000 | -2.938665000000 | -2.291366000000 |
| N  | 1.177911000000  | -4.402331000000 | -2.720375000000 |
| C  | -2.462209000000 | -0.010702000000 | 0.234903000000  |
| C  | -3.369872000000 | 0.780641000000  | 0.975374000000  |
| C  | -4.648842000000 | 1.053724000000  | 0.525676000000  |
| C  | -5.075121000000 | 0.522213000000  | -0.691562000000 |
| C  | -4.240155000000 | -0.304118000000 | -1.418347000000 |
| C  | -2.944529000000 | -0.598517000000 | -0.967339000000 |
| C  | -2.158377000000 | -1.527703000000 | -1.752444000000 |
| C  | 0.576727000000  | -3.525089000000 | -1.867521000000 |
| H  | -3.030063000000 | 1.159090000000  | 1.933654000000  |
| H  | -5.321677000000 | 1.666420000000  | 1.116483000000  |
| H  | -4.592767000000 | -0.744429000000 | -2.346042000000 |
| H  | -2.554205000000 | -1.853046000000 | -2.714126000000 |
| H  | 1.839973000000  | -5.051250000000 | -2.330706000000 |
| H  | 0.617609000000  | -4.722448000000 | -3.494491000000 |
| S  | -1.240489000000 | -2.818643000000 | 1.707766000000  |
| O  | 0.971013000000  | -0.402825000000 | -0.928457000000 |
| N  | 1.011362000000  | -1.042165000000 | 1.789176000000  |
| N  | 0.518519000000  | -1.235552000000 | 3.059744000000  |
| N  | -1.081769000000 | -2.261345000000 | 4.305209000000  |
| C  | 2.247734000000  | -0.185748000000 | -0.762610000000 |
| C  | 3.044334000000  | 0.106402000000  | -1.892875000000 |
| C  | 4.372274000000  | 0.467263000000  | -1.777305000000 |
| C  | 4.957726000000  | 0.546951000000  | -0.510852000000 |
| C  | 4.227676000000  | 0.227436000000  | 0.616552000000  |
| C  | 2.881138000000  | -0.159399000000 | 0.512625000000  |
| C  | 2.176376000000  | -0.490163000000 | 1.736590000000  |
| C  | -0.522270000000 | -2.029736000000 | 3.084665000000  |
| H  | 2.569764000000  | 0.035381000000  | -2.865758000000 |
| H  | 4.962161000000  | 0.689737000000  | -2.660049000000 |
| H  | 4.698893000000  | 0.265644000000  | 1.594116000000  |
| H  | 2.662136000000  | -0.276020000000 | 2.689035000000  |
| H  | -1.715755000000 | -3.037948000000 | 4.386000000000  |
| H  | -0.510008000000 | -2.045412000000 | 5.106436000000  |
| Cl | 6.632934000000  | 1.045277000000  | -0.357723000000 |
| Cl | -6.685599000000 | 0.884917000000  | -1.284779000000 |
| C  | 0.426697000000  | 2.373313000000  | 1.169823000000  |
| H  | 1.125995000000  | 1.669321000000  | 0.725513000000  |
| H  | -0.476041000000 | 1.789550000000  | 1.354377000000  |
| N  | 0.093564000000  | 3.364583000000  | 0.068691000000  |
| C  | 0.998721000000  | 2.961769000000  | 2.442688000000  |
| H  | 1.149908000000  | 2.123531000000  | 3.127918000000  |
| H  | 0.322740000000  | 3.665145000000  | 2.936449000000  |
| H  | 1.968832000000  | 3.444128000000  | 2.295196000000  |
| C  | 1.328327000000  | 4.110026000000  | -0.387951000000 |
| H  | 0.986509000000  | 4.830316000000  | -1.133951000000 |
| H  | 1.672596000000  | 4.680007000000  | 0.476915000000  |
| C  | -2.153850000000 | 3.938452000000  | 1.181527000000  |
| H  | -1.973579000000 | 3.366680000000  | 2.093733000000  |
| H  | -2.759249000000 | 3.327983000000  | 0.510617000000  |
| H  | -2.741403000000 | 4.819313000000  | 1.453079000000  |
| C  | -0.514269000000 | 2.533769000000  | -1.054261000000 |

|   |                |               |                |
|---|----------------|---------------|----------------|
| H | 0.14147500000  | 1.67058600000 | -1.19835500000 |
| H | -1.44298700000 | 2.13040200000 | -0.65336100000 |
| C | -0.86795300000 | 4.42885200000 | 0.54762200000  |
| H | -0.30860500000 | 5.04261100000 | 1.25633100000  |
| H | -1.08476800000 | 5.05568700000 | -0.31932500000 |
| C | 2.45069600000  | 3.25705900000 | -0.93891700000 |
| H | 2.88031800000  | 2.58554200000 | -0.19329400000 |
| H | 3.24550800000  | 3.92858900000 | -1.27257400000 |
| H | 2.14323100000  | 2.65516500000 | -1.79456000000 |
| C | -0.76768600000 | 3.27100400000 | -2.35454500000 |
| H | 0.14905400000  | 3.61769700000 | -2.83737600000 |
| H | -1.45624200000 | 4.11367800000 | -2.24905800000 |
| H | -1.23933400000 | 2.55594200000 | -3.03261100000 |

**Table S23.** Optimized coordinates (wB97XD/6-31G(d,p)) of GO-1 (HS1) hybrid system in the sextet (HS) state. Units are in Å.

|   |                 |                 |                 |
|---|-----------------|-----------------|-----------------|
| C | 10.093498000000 | -3.532072000000 | 0.694752000000  |
| C | 9.392038000000  | -2.261367000000 | 0.702081000000  |
| C | 8.052347000000  | -2.204587000000 | 0.866288000000  |
| C | 7.044721000000  | -3.283588000000 | 0.600977000000  |
| C | 5.654724000000  | -2.923941000000 | -0.123432000000 |
| C | 11.425028000000 | -3.556177000000 | 0.929068000000  |
| C | 1.555790000000  | -1.701799000000 | -0.105065000000 |
| C | 1.179879000000  | -0.526567000000 | -0.927338000000 |
| C | -0.290082000000 | -0.226728000000 | -1.026312000000 |
| C | -1.165648000000 | -1.219108000000 | -1.707186000000 |
| C | -2.396710000000 | -0.876917000000 | -2.140444000000 |
| C | 2.821902000000  | -1.945122000000 | 0.257108000000  |
| C | 2.122397000000  | 0.604697000000  | -0.941580000000 |
| C | 3.465496000000  | 0.413199000000  | -0.238083000000 |
| C | 4.378735000000  | 1.543304000000  | -0.753122000000 |
| C | 3.925019000000  | 2.859406000000  | -0.460374000000 |
| C | 2.524083000000  | 3.060856000000  | -0.290278000000 |
| C | 1.633893000000  | 2.054496000000  | -0.938823000000 |
| C | 5.629809000000  | 1.400951000000  | -1.311280000000 |
| C | 4.945343000000  | 3.798249000000  | -0.277685000000 |
| C | 6.615522000000  | 2.337474000000  | -1.009231000000 |
| C | 2.033075000000  | 4.307634000000  | 0.200297000000  |
| C | 3.916974000000  | -1.072727000000 | -0.214270000000 |
| C | 5.187148000000  | -1.505388000000 | -0.351473000000 |
| C | 6.229036000000  | -0.582462000000 | -0.794583000000 |
| C | 7.321589000000  | -0.324452000000 | -0.091103000000 |
| C | 8.402944000000  | 0.620097000000  | -0.417199000000 |
| C | 8.071703000000  | 2.017773000000  | -0.895603000000 |
| C | 9.040145000000  | 3.106052000000  | -0.555205000000 |
| C | 10.251895000000 | -1.019917000000 | 0.346160000000  |
| C | 11.621087000000 | -1.119266000000 | 1.001703000000  |
| C | 12.377063000000 | 0.094366000000  | 1.279007000000  |
| C | 11.837144000000 | 1.324280000000  | 1.200582000000  |
| C | 10.426635000000 | 1.540292000000  | 0.821716000000  |
| C | 9.601054000000  | 0.375438000000  | 0.483873000000  |
| C | 10.103056000000 | 2.863534000000  | 0.217980000000  |
| C | 12.169486000000 | -2.334683000000 | 1.190111000000  |
| C | -2.559357000000 | 2.875643000000  | -1.473392000000 |
| C | -1.681400000000 | 3.806516000000  | -0.674316000000 |
| C | -2.888257000000 | 0.473514000000  | -2.065629000000 |
| C | -2.098004000000 | 1.506911000000  | -1.611414000000 |
| C | -0.786958000000 | 1.165890000000  | -1.024726000000 |
| C | 0.192666000000  | 2.296129000000  | -1.000735000000 |
| C | -0.381797000000 | 3.557970000000  | -0.458211000000 |
| C | 0.505057000000  | 4.510434000000  | 0.276308000000  |
| O | 3.321130000000  | 0.667565000000  | 1.150834000000  |
| O | -4.143564000000 | 0.690472000000  | -2.447551000000 |
| O | 13.655329000000 | -0.087111000000 | 1.662168000000  |
| O | 7.463090000000  | -0.985352000000 | 1.100177000000  |
| H | 2.865780000000  | 1.518715000000  | 1.253896000000  |
| C | -2.421286000000 | 5.002119000000  | -0.146568000000 |
| O | -3.197042000000 | 4.919702000000  | 0.777309000000  |
| O | -2.191429000000 | 6.108266000000  | -0.844885000000 |
| H | -2.697064000000 | 6.819748000000  | -0.427338000000 |
| H | -4.594551000000 | -0.150586000000 | -2.627803000000 |
| C | 12.180771000000 | -4.835546000000 | 1.022531000000  |
| O | 13.352472000000 | -4.905041000000 | 1.313660000000  |
| O | 11.431175000000 | -5.913027000000 | 0.744171000000  |
| H | 12.006774000000 | -6.683224000000 | 0.843189000000  |

|    |                  |                 |                 |
|----|------------------|-----------------|-----------------|
| C  | 3.092844000000   | -2.961276000000 | 1.318640000000  |
| O  | 4.076099000000   | -2.970829000000 | 2.022696000000  |
| O  | 2.094709000000   | -3.842849000000 | 1.458337000000  |
| H  | 2.346956000000   | -4.425075000000 | 2.188045000000  |
| C  | 8.959076000000   | 4.446531000000  | -1.208723000000 |
| O  | 9.583023000000   | 5.416825000000  | -0.855853000000 |
| O  | 8.139444000000   | 4.440996000000  | -2.272412000000 |
| H  | 8.164676000000   | 5.329845000000  | -2.653346000000 |
| O  | 0.994436000000   | 2.437746000000  | -2.174079000000 |
| O  | 9.445564000000   | 0.976441000000  | 1.747400000000  |
| O  | 5.957423000000   | 0.208751000000  | -1.888487000000 |
| O  | -0.618429000000  | -2.428971000000 | -1.832566000000 |
| H  | -1.196316000000  | -3.031595000000 | -2.329235000000 |
| O  | 10.416407000000  | -1.080434000000 | -1.073926000000 |
| H  | 11.021065000000  | -1.802112000000 | -1.278010000000 |
| O  | -0.813017000000  | 0.351107000000  | 0.172177000000  |
| H  | 14.036423000000  | 0.791638000000  | 1.793976000000  |
| H  | 10.824704000000  | 3.661820000000  | 0.358962000000  |
| H  | -3.040604000000  | -1.626168000000 | -2.584469000000 |
| H  | 0.755385000000   | -2.317572000000 | 0.284486000000  |
| H  | 9.522428000000   | -4.449196000000 | 0.613744000000  |
| H  | 13.187294000000  | -2.431351000000 | 1.548880000000  |
| H  | 4.793755000000   | 4.795517000000  | 0.106293000000  |
| O  | 0.043011000000   | 5.429981000000  | 0.913300000000  |
| O  | 2.741332000000   | 5.233957000000  | 0.597421000000  |
| O  | 6.225904000000   | 3.473339000000  | -0.457762000000 |
| O  | 7.244897000000   | -4.452332000000 | 0.810197000000  |
| O  | 12.646057000000  | 2.410938000000  | 1.475504000000  |
| H  | 12.336197000000  | 2.844373000000  | 2.279142000000  |
| O  | -3.618540000000  | 3.321499000000  | -1.900212000000 |
| O  | 1.948352000000   | -0.195956000000 | -2.089625000000 |
| O  | 5.044572000000   | -3.868765000000 | -0.549729000000 |
| O  | 8.567747000000   | 1.004961000000  | -1.760785000000 |
| Fe | -8.348320000000  | -2.027138000000 | 0.573700000000  |
| S  | -8.677076000000  | -4.212905000000 | -0.338871000000 |
| O  | -8.944044000000  | -0.366509000000 | 1.277193000000  |
| N  | -9.839936000000  | -1.649072000000 | -0.989230000000 |
| N  | -9.872429000000  | -2.482454000000 | -2.083408000000 |
| N  | -9.269188000000  | -4.507288000000 | -2.918352000000 |
| C  | -9.922284000000  | 0.471744000000  | 1.066878000000  |
| C  | -10.203208000000 | 1.471059000000  | 2.023510000000  |
| C  | -11.156107000000 | 2.447704000000  | 1.795880000000  |
| C  | -11.872320000000 | 2.444543000000  | 0.598640000000  |
| C  | -11.660770000000 | 1.451453000000  | -0.338586000000 |
| C  | -10.704239000000 | 0.449668000000  | -0.117284000000 |
| C  | -10.566219000000 | -0.592043000000 | -1.114911000000 |
| C  | -9.327978000000  | -3.647144000000 | -1.862148000000 |
| H  | -9.669884000000  | 1.435258000000  | 2.967432000000  |
| H  | -11.356675000000 | 3.206669000000  | 2.544303000000  |
| H  | -12.243867000000 | 1.439061000000  | -1.254299000000 |
| H  | -11.136109000000 | -0.487966000000 | -2.040021000000 |
| H  | -9.108189000000  | -5.479414000000 | -2.717171000000 |
| H  | -9.862622000000  | -4.285556000000 | -3.702833000000 |
| S  | -8.868884000000  | -2.960909000000 | 2.855493000000  |
| O  | -7.118178000000  | -1.372376000000 | -0.870364000000 |
| N  | -6.420554000000  | -2.304016000000 | 1.528444000000  |
| N  | -6.286557000000  | -2.097351000000 | 2.883804000000  |
| N  | -7.384655000000  | -2.024955000000 | 4.870690000000  |
| C  | -6.167401000000  | -2.109247000000 | -1.359761000000 |
| C  | -5.970917000000  | -2.192363000000 | -2.760280000000 |
| C  | -4.988211000000  | -3.006066000000 | -3.305812000000 |
| C  | -4.137027000000  | -3.714948000000 | -2.458515000000 |



|    |                  |                 |                 |
|----|------------------|-----------------|-----------------|
| C  | -4.262794000000  | -3.623666000000 | -1.083215000000 |
| C  | -5.271808000000  | -2.838951000000 | -0.521913000000 |
| C  | -5.368514000000  | -2.730166000000 | 0.921768000000  |
| C  | -7.408391000000  | -2.317289000000 | 3.533046000000  |
| H  | -6.677585000000  | -1.669777000000 | -3.396623000000 |
| H  | -4.878354000000  | -3.091809000000 | -4.381518000000 |
| H  | -3.582235000000  | -4.168625000000 | -0.435970000000 |
| H  | -4.497830000000  | -2.989299000000 | 1.527559000000  |
| H  | -8.119787000000  | -2.429024000000 | 5.427817000000  |
| H  | -6.466905000000  | -1.998667000000 | 5.290245000000  |
| Cl | -2.812591000000  | -4.656500000000 | -3.143698000000 |
| Cl | -13.064106000000 | 3.693537000000  | 0.298173000000  |
| C  | -6.547414000000  | 1.316769000000  | 2.521968000000  |
| H  | -6.526770000000  | 0.268709000000  | 2.229764000000  |
| H  | -7.597031000000  | 1.578793000000  | 2.627687000000  |
| N  | -6.030849000000  | 2.112582000000  | 1.343972000000  |
| C  | -5.807150000000  | 1.511594000000  | 3.830198000000  |
| H  | -6.244991000000  | 0.806205000000  | 4.541186000000  |
| H  | -5.917886000000  | 2.518771000000  | 4.240514000000  |
| H  | -4.743117000000  | 1.276443000000  | 3.753514000000  |
| C  | -4.576748000000  | 1.793538000000  | 1.067930000000  |
| H  | -4.340221000000  | 2.309557000000  | 0.140396000000  |
| H  | -3.997915000000  | 2.277249000000  | 1.856267000000  |
| C  | -7.492664000000  | 4.143857000000  | 1.869744000000  |
| H  | -7.937401000000  | 3.733060000000  | 2.779003000000  |
| H  | -8.185014000000  | 3.969446000000  | 1.043771000000  |
| H  | -7.402510000000  | 5.224053000000  | 2.006504000000  |
| C  | -6.905154000000  | 1.727462000000  | 0.160167000000  |
| H  | -6.760577000000  | 0.659044000000  | -0.002028000000 |
| H  | -7.929767000000  | 1.853844000000  | 0.504695000000  |
| C  | -6.100610000000  | 3.598822000000  | 1.603604000000  |
| H  | -5.441130000000  | 3.797187000000  | 2.449311000000  |
| H  | -5.640403000000  | 4.080881000000  | 0.740349000000  |
| C  | -4.247202000000  | 0.318129000000  | 0.973240000000  |
| H  | -4.462821000000  | -0.226682000000 | 1.895247000000  |
| H  | -3.176748000000  | 0.229593000000  | 0.772774000000  |
| H  | -4.782038000000  | -0.163565000000 | 0.153116000000  |
| C  | -6.683622000000  | 2.503786000000  | -1.122394000000 |
| H  | -5.673788000000  | 2.420032000000  | -1.525273000000 |
| H  | -6.938825000000  | 3.562484000000  | -1.028031000000 |
| H  | -7.367172000000  | 2.070307000000  | -1.857542000000 |

**Table S24.** Optimized coordinates (wB97XD/6-31G(d,p)) of GO-1 (LS1) hybrid system in the doublet (LS) state. Units are in Å.

|   |                 |                 |                 |
|---|-----------------|-----------------|-----------------|
| C | 10.244676000000 | -3.545108000000 | 0.762300000000  |
| C | 9.520988000000  | -2.286992000000 | 0.774038000000  |
| C | 8.173982000000  | -2.257211000000 | 0.872204000000  |
| C | 7.201306000000  | -3.344185000000 | 0.523794000000  |
| C | 5.842552000000  | -2.984773000000 | -0.257397000000 |
| C | 11.564096000000 | -3.554444000000 | 1.057706000000  |
| C | 1.728081000000  | -1.828888000000 | -0.399717000000 |
| C | 1.370727000000  | -0.641990000000 | -1.213578000000 |
| C | -0.097616000000 | -0.361123000000 | -1.376685000000 |
| C | -0.936505000000 | -1.361271000000 | -2.093848000000 |
| C | -2.138320000000 | -1.024892000000 | -2.604387000000 |
| C | 2.980334000000  | -2.061059000000 | 0.013955000000  |
| C | 2.293765000000  | 0.504309000000  | -1.158553000000 |
| C | 3.603817000000  | 0.318164000000  | -0.392955000000 |
| C | 4.520933000000  | 1.477744000000  | -0.830185000000 |
| C | 4.028073000000  | 2.776917000000  | -0.525015000000 |
| C | 2.616259000000  | 2.948578000000  | -0.424494000000 |
| C | 1.782708000000  | 1.946262000000  | -1.149541000000 |
| C | 5.802177000000  | 1.372010000000  | -1.324642000000 |
| C | 5.020012000000  | 3.726410000000  | -0.261082000000 |
| C | 6.753332000000  | 2.315407000000  | -0.943179000000 |
| C | 2.076046000000  | 4.171094000000  | 0.075673000000  |
| C | 4.080905000000  | -1.159627000000 | -0.383991000000 |
| C | 5.363435000000  | -1.567733000000 | -0.470583000000 |
| C | 6.410278000000  | -0.615999000000 | -0.833790000000 |
| C | 7.460167000000  | -0.361197000000 | -0.067073000000 |
| C | 8.539006000000  | 0.611187000000  | -0.308697000000 |
| C | 8.207275000000  | 2.017266000000  | -0.761697000000 |
| C | 9.136401000000  | 3.110532000000  | -0.337722000000 |
| C | 10.374926000000 | -1.021439000000 | 0.496940000000  |
| C | 11.713263000000 | -1.118352000000 | 1.213768000000  |
| C | 12.433009000000 | 0.098113000000  | 1.565237000000  |
| C | 11.875084000000 | 1.320809000000  | 1.500141000000  |
| C | 10.481258000000 | 1.525432000000  | 1.058395000000  |
| C | 9.694190000000  | 0.358558000000  | 0.644853000000  |
| C | 10.163105000000 | 2.861683000000  | 0.481032000000  |
| C | 12.274059000000 | -2.329926000000 | 1.390465000000  |
| C | -2.373893000000 | 2.725665000000  | -1.931944000000 |
| C | -1.568312000000 | 3.643798000000  | -1.042794000000 |
| C | -2.649838000000 | 0.322081000000  | -2.545092000000 |
| C | -1.896805000000 | 1.353805000000  | -2.036824000000 |
| C | -0.612780000000 | 1.023714000000  | -1.387877000000 |
| C | 0.344919000000  | 2.168644000000  | -1.291166000000 |
| C | -0.281617000000 | 3.406899000000  | -0.750111000000 |
| C | 0.542434000000  | 4.347061000000  | 0.067788000000  |
| O | 3.383849000000  | 0.534196000000  | 0.992891000000  |
| O | -3.883823000000 | 0.535713000000  | -2.994700000000 |
| O | 13.694043000000 | -0.074581000000 | 2.005125000000  |
| O | 7.551786000000  | -1.055179000000 | 1.110271000000  |
| H | 2.912552000000  | 1.377274000000  | 1.092376000000  |
| C | -2.361517000000 | 4.812649000000  | -0.537905000000 |
| O | -3.197562000000 | 4.691766000000  | 0.328848000000  |
| O | -2.106931000000 | 5.941061000000  | -1.185538000000 |
| H | -2.666009000000 | 6.628637000000  | -0.796374000000 |
| H | -4.360576000000 | -0.303061000000 | -3.101629000000 |
| C | 12.337964000000 | -4.823526000000 | 1.144232000000  |
| O | 13.498625000000 | -4.882231000000 | 1.478539000000  |
| O | 11.618235000000 | -5.904462000000 | 0.806743000000  |
| H | 12.203136000000 | -6.667751000000 | 0.904816000000  |

|    |                  |                 |                 |
|----|------------------|-----------------|-----------------|
| C  | 3.219469000000   | -3.098182000000 | 1.062898000000  |
| O  | 4.168529000000   | -3.108487000000 | 1.812413000000  |
| O  | 2.231981000000   | -3.999903000000 | 1.134502000000  |
| H  | 2.462453000000   | -4.597033000000 | 1.859368000000  |
| C  | 9.064247000000   | 4.469740000000  | -0.952718000000 |
| O  | 9.645350000000   | 5.440208000000  | -0.533437000000 |
| O  | 8.308687000000   | 4.481782000000  | -2.062670000000 |
| H  | 8.336524000000   | 5.382591000000  | -2.414247000000 |
| O  | 1.210090000000   | 2.349906000000  | -2.411663000000 |
| O  | 9.465519000000   | 0.916448000000  | 1.916634000000  |
| O  | 6.180765000000   | 0.202653000000  | -1.917075000000 |
| O  | -0.397245000000  | -2.580852000000 | -2.167618000000 |
| H  | -1.022706000000  | -3.196287000000 | -2.580581000000 |
| O  | 10.606898000000  | -1.036172000000 | -0.914879000000 |
| H  | 11.236837000000  | -1.738138000000 | -1.111095000000 |
| O  | -0.681297000000  | 0.198902000000  | -0.195760000000 |
| H  | 14.052562000000  | 0.805488000000  | 2.183465000000  |
| H  | 10.860584000000  | 3.667755000000  | 0.684974000000  |
| H  | -2.745679000000  | -1.778658000000 | -3.088893000000 |
| H  | 0.921305000000   | -2.466128000000 | -0.062035000000 |
| H  | 9.695441000000   | -4.469005000000 | 0.625947000000  |
| H  | 13.275091000000  | -2.421539000000 | 1.794756000000  |
| H  | 4.831581000000   | 4.709315000000  | 0.143064000000  |
| O  | 0.026322000000   | 5.235908000000  | 0.707115000000  |
| O  | 2.744023000000   | 5.095206000000  | 0.541505000000  |
| O  | 6.314006000000   | 3.427674000000  | -0.381086000000 |
| O  | 7.411747000000   | -4.515495000000 | 0.707052000000  |
| O  | 12.649708000000  | 2.411130000000  | 1.848793000000  |
| H  | 12.294067000000  | 2.812720000000  | 2.650032000000  |
| O  | -3.373108000000  | 3.178429000000  | -2.468540000000 |
| O  | 2.188806000000   | -0.273393000000 | -2.330388000000 |
| O  | 5.267594000000   | -3.925981000000 | -0.737374000000 |
| O  | 8.765256000000   | 1.039697000000  | -1.629599000000 |
| Fe | -8.978896000000  | -1.766889000000 | 0.402939000000  |
| S  | -9.332462000000  | -3.765400000000 | -0.602498000000 |
| O  | -8.742233000000  | -0.079825000000 | 1.271247000000  |
| N  | -10.406444000000 | -1.108759000000 | -0.756523000000 |
| N  | -10.888713000000 | -1.884785000000 | -1.793443000000 |
| N  | -10.829547000000 | -3.925078000000 | -2.801043000000 |
| C  | -9.587184000000  | 0.912106000000  | 1.252036000000  |
| C  | -9.478278000000  | 1.917328000000  | 2.242097000000  |
| C  | -10.260647000000 | 3.056665000000  | 2.231062000000  |
| C  | -11.212719000000 | 3.225726000000  | 1.225927000000  |
| C  | -11.392774000000 | 2.243317000000  | 0.272968000000  |
| C  | -10.608830000000 | 1.079508000000  | 0.277209000000  |
| C  | -10.908197000000 | 0.076504000000  | -0.719904000000 |
| C  | -10.426869000000 | -3.100390000000 | -1.790347000000 |
| H  | -8.767172000000  | 1.759066000000  | 3.045161000000  |
| H  | -10.148453000000 | 3.809896000000  | 3.003847000000  |
| H  | -12.157294000000 | 2.364805000000  | -0.488247000000 |
| H  | -11.641896000000 | 0.318303000000  | -1.487943000000 |
| H  | -10.727526000000 | -4.915198000000 | -2.655578000000 |
| H  | -11.641855000000 | -3.621520000000 | -3.315250000000 |
| S  | -10.242719000000 | -2.328818000000 | 2.221570000000  |
| O  | -7.766706000000  | -1.227669000000 | -1.011461000000 |
| N  | -7.494176000000  | -2.462254000000 | 1.456902000000  |
| N  | -7.595399000000  | -2.553828000000 | 2.825016000000  |
| N  | -9.034929000000  | -2.550659000000 | 4.582966000000  |
| C  | -6.740528000000  | -1.937937000000 | -1.355177000000 |
| C  | -6.268448000000  | -1.874293000000 | -2.692994000000 |
| C  | -5.208177000000  | -2.650718000000 | -3.132240000000 |
| C  | -4.538729000000  | -3.474452000000 | -2.223229000000 |

|    |                  |                 |                 |
|----|------------------|-----------------|-----------------|
| C  | -4.928767000000  | -3.526790000000 | -0.899576000000 |
| C  | -6.027221000000  | -2.783418000000 | -0.451551000000 |
| C  | -6.372744000000  | -2.860052000000 | 0.956311000000  |
| C  | -8.840586000000  | -2.480725000000 | 3.238171000000  |
| H  | -6.829106000000  | -1.255985000000 | -3.386294000000 |
| H  | -4.920650000000  | -2.645948000000 | -4.180018000000 |
| H  | -4.394277000000  | -4.164916000000 | -0.202417000000 |
| H  | -5.645322000000  | -3.283547000000 | 1.650205000000  |
| H  | -9.972138000000  | -2.707071000000 | 4.912779000000  |
| H  | -8.279864000000  | -2.934428000000 | 5.128857000000  |
| Cl | -3.195787000000  | -4.477488000000 | -2.779471000000 |
| Cl | -12.199395000000 | 4.675077000000  | 1.194423000000  |
| C  | -5.903470000000  | 0.425139000000  | 2.530947000000  |
| H  | -6.028015000000  | -0.479290000000 | 1.941807000000  |
| H  | -6.917752000000  | 0.747276000000  | 2.754350000000  |
| N  | -5.312971000000  | 1.459696000000  | 1.596596000000  |
| C  | -5.115166000000  | 0.135928000000  | 3.791312000000  |
| H  | -5.631446000000  | -0.688810000000 | 4.288862000000  |
| H  | -5.081909000000  | 0.982873000000  | 4.481577000000  |
| H  | -4.092590000000  | -0.193602000000 | 3.588569000000  |
| C  | -3.957993000000  | 1.025363000000  | 1.085653000000  |
| H  | -3.630221000000  | 1.805269000000  | 0.396769000000  |
| H  | -3.279959000000  | 1.051970000000  | 1.940509000000  |
| C  | -6.298765000000  | 3.410520000000  | 2.949474000000  |
| H  | -6.708989000000  | 2.790095000000  | 3.749859000000  |
| H  | -7.096699000000  | 3.638451000000  | 2.240995000000  |
| H  | -5.974666000000  | 4.353630000000  | 3.396099000000  |
| C  | -6.313853000000  | 1.603498000000  | 0.456888000000  |
| H  | -6.588977000000  | 0.594082000000  | 0.146671000000  |
| H  | -7.208773000000  | 2.024535000000  | 0.911376000000  |
| C  | -5.082453000000  | 2.782847000000  | 2.294907000000  |
| H  | -4.312711000000  | 2.593732000000  | 3.046019000000  |
| H  | -4.643133000000  | 3.452807000000  | 1.554974000000  |
| C  | -3.923098000000  | -0.336772000000 | 0.431094000000  |
| H  | -4.189217000000  | -1.137456000000 | 1.122646000000  |
| H  | -2.897615000000  | -0.508186000000 | 0.103320000000  |
| H  | -4.580418000000  | -0.400851000000 | -0.437983000000 |
| C  | -5.852809000000  | 2.430317000000  | -0.723886000000 |
| H  | -5.115039000000  | 1.917666000000  | -1.340968000000 |
| H  | -5.451273000000  | 3.409730000000  | -0.452772000000 |
| H  | -6.729806000000  | 2.597080000000  | -1.353858000000 |

**Table S25.** Optimized coordinates (wB97XD/6-31G(d,p)) of GO-1 (LS2) hybrid system in the doublet (LS) state. Units are in Å.

|   |                |                |                |
|---|----------------|----------------|----------------|
| C | 7.96427000000  | 3.11683500000  | 2.36046800000  |
| C | 7.31499600000  | 2.21650200000  | 1.42512100000  |
| C | 5.98757100000  | 1.97482500000  | 1.49476300000  |
| C | 5.08504900000  | 2.12847500000  | 2.68063500000  |
| C | 3.93443900000  | 1.03995700000  | 2.97302600000  |
| C | 9.16515100000  | 3.64944100000  | 2.04138300000  |
| C | 0.11550900000  | -0.84310700000 | 2.73543200000  |
| C | 0.02988000000  | -2.23688800000 | 2.23328100000  |
| C | -1.35347000000 | -2.82301100000 | 2.24426900000  |
| C | -2.00358300000 | -3.06932000000 | 3.55481100000  |
| C | -3.10578700000 | -3.83485500000 | 3.65064600000  |
| C | 1.16619100000  | -0.05072900000 | 2.49085500000  |
| C | 0.92373000000  | -2.60462600000 | 1.12669400000  |
| C | 1.97743600000  | -1.58525600000 | 0.69665900000  |
| C | 3.03005200000  | -2.38185500000 | -0.09589300000 |
| C | 2.53872800000  | -3.00987500000 | -1.27263300000 |
| C | 1.14468200000  | -3.31353400000 | -1.33353200000 |
| C | 0.45111900000  | -3.49905900000 | -0.02278900000 |
| C | 4.38662000000  | -2.41110200000 | 0.14011300000  |
| C | 3.48226600000  | -3.15616500000 | -2.29319600000 |
| C | 5.26048000000  | -2.46589800000 | -0.94308100000 |
| C | 0.55222900000  | -3.70265000000 | -2.57108800000 |
| C | 2.36608700000  | -0.59006200000 | 1.82320900000  |
| C | 3.60541500000  | -0.09488100000 | 2.03262300000  |
| C | 4.75440900000  | -0.70181500000 | 1.36596900000  |
| C | 5.60005100000  | -0.03012800000 | 0.59824700000  |
| C | 6.75384500000  | -0.55999500000 | -0.14929200000 |
| C | 6.61057300000  | -1.82560500000 | -0.96866200000 |
| C | 7.45958200000  | -1.94940800000 | -2.19400100000 |
| C | 8.26524300000  | 1.44307600000  | 0.47386400000  |
| C | 9.37772700000  | 2.35356700000  | -0.02185800000 |
| C | 10.04368500000 | 2.05652600000  | -1.28276700000 |
| C | 9.57586700000  | 1.14813000000  | -2.15894500000 |
| C | 8.34359100000  | 0.37506100000  | -1.90455700000 |
| C | 7.63002700000  | 0.58027400000  | -0.63941300000 |
| C | 8.23993000000  | -0.94118800000 | -2.59440900000 |
| C | 9.82263000000  | 3.33814300000  | 0.78228400000  |
| C | -3.55897200000 | -5.17746600000 | 0.09871600000  |
| C | -2.84782200000 | -4.89055500000 | -1.20602900000 |
| C | -3.65401900000 | -4.53235500000 | 2.50494500000  |
| C | -3.01460700000 | -4.53346800000 | 1.28898200000  |
| C | -1.86363400000 | -3.63081000000 | 1.11236500000  |
| C | -0.92861200000 | -3.99637800000 | 0.00141000000  |
| C | -1.62075600000 | -4.35086400000 | -1.26785900000 |
| C | -0.93895000000 | -4.09630600000 | -2.57014200000 |
| O | 1.39619500000  | -0.70097700000 | -0.25859100000 |
| O | -4.77903400000 | -5.21766500000 | 2.67842600000  |
| O | 11.14929500000 | 2.77880000000  | -1.54331400000 |
| O | 5.37666100000  | 1.31297400000  | 0.45460600000  |
| H | 1.04091200000  | -1.26497200000 | -0.97004400000 |
| C | -3.67488400000 | -5.22632200000 | -2.41555400000 |
| O | -4.53820400000 | -4.48977400000 | -2.82301900000 |
| O | -3.39107400000 | -6.42405700000 | -2.91841500000 |
| H | -3.98068800000 | -6.55859300000 | -3.67416500000 |
| H | -5.23524600000 | -4.90506600000 | 3.47348200000  |
| C | 9.83566200000  | 4.64881800000  | 2.91941000000  |
| O | 10.86827500000 | 5.20870500000  | 2.63315500000  |
| O | 9.17959400000  | 4.86328000000  | 4.06952100000  |

|    |                  |                 |                 |
|----|------------------|-----------------|-----------------|
| H  | 9.684336000000   | 5.527789000000  | 4.557488000000  |
| C  | 1.018414000000   | 1.424365000000  | 2.679561000000  |
| O  | 1.619112000000   | 2.249821000000  | 2.031156000000  |
| O  | 0.081811000000   | 1.740079000000  | 3.580053000000  |
| H  | 0.011197000000   | 2.704838000000  | 3.580943000000  |
| C  | 7.608766000000   | -3.255555000000 | -2.903131000000 |
| O  | 8.124460000000   | -3.389102000000 | -3.985147000000 |
| O  | 7.139274000000   | -4.281434000000 | -2.174564000000 |
| H  | 7.301138000000   | -5.088136000000 | -2.683463000000 |
| O  | 0.157717000000   | -4.846372000000 | 0.381079000000  |
| O  | 7.121075000000   | 1.172630000000  | -1.810682000000 |
| O  | 4.840360000000   | -2.077233000000 | 1.381687000000  |
| O  | -1.378000000000  | -2.475760000000 | 4.583116000000  |
| H  | -1.791082000000  | -2.720382000000 | 5.418370000000  |
| O  | 8.838903000000   | 0.415088000000  | 1.287488000000  |
| H  | 9.470965000000   | 0.821601000000  | 1.890261000000  |
| O  | -2.168922000000  | -2.222826000000 | 1.237943000000  |
| H  | 11.498395000000  | 2.467396000000  | -2.389395000000 |
| H  | 8.904987000000   | -1.113836000000 | -3.434546000000 |
| H  | -3.596664000000  | -3.964121000000 | 4.609869000000  |
| H  | -0.770044000000  | -0.429406000000 | 3.201437000000  |
| H  | 7.427117000000   | 3.436242000000  | 3.245343000000  |
| H  | 10.689017000000  | 3.927148000000  | 0.505338000000  |
| H  | 3.249796000000   | -3.467372000000 | -3.300179000000 |
| O  | -1.535733000000  | -4.175104000000 | -3.621737000000 |
| O  | 1.134881000000   | -3.706826000000 | -3.656488000000 |
| O  | 4.752634000000   | -2.793064000000 | -2.118305000000 |
| O  | 5.210895000000   | 2.991686000000  | 3.510499000000  |
| O  | 10.291295000000  | 0.932108000000  | -3.321121000000 |
| H  | 9.773927000000   | 1.232784000000  | -4.077190000000 |
| O  | -4.541524000000  | -5.898178000000 | 0.064391000000  |
| O  | 1.118006000000   | -3.146862000000 | 2.415036000000  |
| O  | 3.394351000000   | 1.155668000000  | 4.041705000000  |
| O  | 7.312747000000   | -1.782189000000 | 0.266040000000  |
| Fe | -6.512479000000  | 2.610899000000  | 0.054810000000  |
| S  | -8.564861000000  | 1.812501000000  | 0.606858000000  |
| O  | -4.796489000000  | 3.280274000000  | -0.450094000000 |
| N  | -7.110905000000  | 2.420541000000  | -1.791337000000 |
| N  | -8.245053000000  | 1.699363000000  | -2.092020000000 |
| N  | -10.122866000000 | 0.729012000000  | -1.255847000000 |
| C  | -4.503844000000  | 3.825912000000  | -1.589887000000 |
| C  | -3.304984000000  | 4.575127000000  | -1.688685000000 |
| C  | -2.837831000000  | 5.062113000000  | -2.894937000000 |
| C  | -3.571078000000  | 4.828723000000  | -4.060326000000 |
| C  | -4.774291000000  | 4.150879000000  | -4.000529000000 |
| C  | -5.264467000000  | 3.652952000000  | -2.783587000000 |
| C  | -6.495013000000  | 2.890718000000  | -2.822042000000 |
| C  | -8.952182000000  | 1.389344000000  | -1.038376000000 |
| H  | -2.756653000000  | 4.753111000000  | -0.768955000000 |
| H  | -1.909138000000  | 5.621214000000  | -2.941772000000 |
| H  | -5.346299000000  | 3.990705000000  | -4.909799000000 |
| H  | -6.949145000000  | 2.694426000000  | -3.793142000000 |
| H  | -10.531758000000 | 0.232153000000  | -0.483422000000 |
| H  | -10.257059000000 | 0.349508000000  | -2.179420000000 |
| S  | -7.172137000000  | 4.774601000000  | 0.270775000000  |
| O  | -5.850074000000  | 0.782588000000  | -0.058776000000 |
| N  | -5.899038000000  | 2.787642000000  | 1.897395000000  |
| N  | -5.720925000000  | 4.034760000000  | 2.454104000000  |
| N  | -6.131886000000  | 6.259175000000  | 2.221749000000  |
| C  | -5.919549000000  | -0.027145000000 | 0.964768000000  |
| C  | -6.145845000000  | -1.407516000000 | 0.752142000000  |
| C  | -6.228623000000  | -2.314403000000 | 1.792447000000  |

|    |                 |                 |                 |
|----|-----------------|-----------------|-----------------|
| C  | -6.078721000000 | -1.855343000000 | 3.100983000000  |
| C  | -5.835113000000 | -0.522543000000 | 3.362379000000  |
| C  | -5.761522000000 | 0.403582000000  | 2.313456000000  |
| C  | -5.598817000000 | 1.801380000000  | 2.669100000000  |
| C  | -6.269466000000 | 4.987756000000  | 1.748478000000  |
| H  | -6.294906000000 | -1.741820000000 | -0.268379000000 |
| H  | -6.421259000000 | -3.362906000000 | 1.590324000000  |
| H  | -5.741556000000 | -0.175663000000 | 4.387141000000  |
| H  | -5.263092000000 | 2.048434000000  | 3.676380000000  |
| H  | -6.749567000000 | 6.960505000000  | 1.849912000000  |
| H  | -5.867506000000 | 6.344765000000  | 3.190498000000  |
| Cl | -6.309877000000 | -2.967011000000 | 4.462223000000  |
| Cl | -2.963414000000 | 5.407430000000  | -5.602199000000 |
| C  | -2.551994000000 | 1.218111000000  | -0.666770000000 |
| H  | -3.580753000000 | 0.947924000000  | -0.418549000000 |
| H  | -2.564531000000 | 2.287031000000  | -0.865913000000 |
| N  | -2.238129000000 | 0.549840000000  | -1.996850000000 |
| C  | -1.596433000000 | 0.892296000000  | 0.459434000000  |
| H  | -2.012859000000 | 1.344426000000  | 1.363550000000  |
| H  | -0.594812000000 | 1.303923000000  | 0.309335000000  |
| H  | -1.515427000000 | -0.179954000000 | 0.637825000000  |
| C  | -2.375596000000 | -0.954796000000 | -1.901876000000 |
| H  | -2.158637000000 | -1.343235000000 | -2.898566000000 |
| H  | -1.577645000000 | -1.292839000000 | -1.234416000000 |
| C  | -0.487520000000 | 2.293013000000  | -2.688543000000 |
| H  | -0.701398000000 | 2.926421000000  | -1.825604000000 |
| H  | -1.012814000000 | 2.703320000000  | -3.553029000000 |
| H  | 0.585028000000  | 2.356073000000  | -2.887345000000 |
| C  | -3.237376000000 | 1.122575000000  | -2.982149000000 |
| H  | -4.214448000000 | 1.040557000000  | -2.504996000000 |
| H  | -3.013669000000 | 2.185161000000  | -3.048182000000 |
| C  | -0.820585000000 | 0.833851000000  | -2.431393000000 |
| H  | -0.182034000000 | 0.443292000000  | -1.639026000000 |
| H  | -0.645006000000 | 0.235805000000  | -3.328213000000 |
| C  | -3.723997000000 | -1.431324000000 | -1.400220000000 |
| H  | -3.781428000000 | -1.392989000000 | -0.313039000000 |
| H  | -3.878366000000 | -2.461915000000 | -1.723380000000 |
| H  | -4.557297000000 | -0.848938000000 | -1.796621000000 |
| C  | -3.247136000000 | 0.491842000000  | -4.360161000000 |
| H  | -3.614996000000 | -0.536451000000 | -4.355113000000 |
| H  | -2.270342000000 | 0.520828000000  | -4.850458000000 |
| H  | -3.931548000000 | 1.084524000000  | -4.971963000000 |
